# 1 **Frequency selective encoding of substrate vibrations in the somatosensory cortex**

2  
3 **Mario Prsa and Daniel Huber**

4 Department of Basic Neurosciences, University of Geneva, Geneva, Switzerland

5  
6 **Sensing vibrations that propagate through solid substrates conveys fundamental information about moving objects**  
7 **and other nearby dynamic events. Here we report that neurons responsive to substrate vibrations applied to the**  
8 **mouse forelimb reveal a new way of representing frequency information in the primary somatosensory cortex (S1). In**  
9 **contrast to vibrotactile stimulation of primate glabrous skin, which produces temporally entrained spiking and**  
10 **frequency independent firing rates, we found that mouse S1 neurons rely on a different coding scheme: their spike**  
11 **rates are conspicuously tuned to a preferred frequency of the stimulus. Histology, peripheral nerve block and**  
12 **optogenetic tagging experiments furthermore reveal that these responses are associated with the activation of**  
13 **mechanoreceptors located in deep subdermal tissue of the distal forelimb. We conclude that the encoding of**  
14 **frequency information of substrate-borne vibrations in the mouse S1 might be analogous to the representation of**  
15 **pitch of airborne sound in auditory cortex.**

## 16 17 **Introduction**

18  
19 Vibrations are ecologically relevant sensory stimuli that can appear in different forms and their spectral content can  
20 convey different types of information. For example, the frequency of skin vibrations produced by actively displacing a  
21 fingertip across an object provides information about the surface texture. Spikes of S1 neurons responding to skin  
22 vibrations of primate fingertips are found to be temporally locked to a preferred phase of the oscillatory cycle, but their  
23 rates are reported to be insensitive to stimulus frequency (Harvey et al., 2013; Mountcastle et al., 1969). Frequency  
24 dependent spike rate modulations could only be obtained with pulsed vibrations in the flutter range (<40 Hz) (Salinas et  
25 al., 2000), in which individual stimulus cycles and not pitch dominate the percept (Saal et al., 2016). The same seems to  
26 be true in rodents, where active whisker-mediated sensation has been advanced as the main modus operandi for  
27 collecting somatosensory information from the environment (Diamond et al., 2008); a functional equivalent to active  
28 hand palpations in primates. Phase-locked spiking and frequency independent firing rates of neural responses to passive  
29 sinusoidal vibrations of single whiskers have been reported in barrel cortex (Ewert et al., 2008) (but see (Arabzadeh et  
30 al., 2004; Arabzadeh et al., 2003)). It therefore seems that in such active sensory systems frequencies are not  
31 discriminated based on differences in rates of discharge of cortical neurons. Instead, the proposed neural coding scheme  
32 for frequency recognition is based on identifying the dominant phase of the oscillatory stimulus in the cyclically  
33 entrained spike trains.

34  
35 Different types of vibratory stimuli are generated by external movements and they can be perceived passively. These are  
36 transmitted through the solid substrate, and their frequency might indicate the size, speed or distance of, for instance, a  
37 nearby conspecific, predator or prey. This passive sensory channel is therefore not primarily adapted to identify object  
38 textures or shapes, but rather tuned for gathering essential information about events occurring in the nearby  
39 environment. Substrate vibrations propagate away from the surface of contact, typically through the limbs (Hunt, 1961;  
40 Hunt and McIntyre, 1960; O'Connell-Rodwell, 2007) and might therefore activate a broad set of mechanoreceptors  
41 distributed along its bones, joints and possibly even in more distant body parts (Bell et al., 1994; Hunt, 1961; Zelena,  
42 1994). The involved network of mechanoreceptors might thus be very different from the one probed in experiments

1 delivering local skin vibrations at the fingertip, since such vibrations attenuate exponentially with distance and do not  
2 seem to propagate beyond the finger (Manfredi et al., 2012). If substrate vibrations indeed rely on a different functional  
3 network of mechanoreceptors, might they also have a distinct neural representation of vibration frequency in the  
4 cortex?

5  
6 To address this question we sought to characterize how neurons in the mouse forelimb representation of the  
7 somatosensory cortex (fS1) encode the frequency of substrate vibrations. Using two-photon calcium imaging and  
8 electrophysiology, we found that neurons in the mouse fS1 show spike rates tuned to different stimulus frequencies and  
9 lack temporally entrained spiking. They bandpass filter the mechanical stimuli to favor a narrow bandwidth of  
10 frequencies where they operate as stimulus feature detectors. We thus propose that the spectral content of structure-  
11 borne vibrations is extracted at the cortical level using a coding mechanism akin to the one operating in the auditory  
12 system for pitch discrimination of airborne sound. This sensory channel therefore appears to be fundamentally different  
13 from active skin- and whisker-based somatosensation.

## 14 15 **Results**

### 16 17 *Vibration frequency selectivity in somatosensory cortex*

18  
19 To deliver substrate vibrations to a single forelimb, we trained head-restrained mice to place their forepaw on a  
20 piezoelectric stack actuator and reinforced continuous holding with liquid rewards (**Fig. 1A,B, Movie S1, Methods**). Pure  
21 sinusoidal vibrations (**Fig. S1**) of different frequencies (100 Hz to 800 Hz) were delivered pseudorandomly to the forepaw  
22 at variable inter-stimulus intervals. To measure the activity of neurons in the contralateral fS1, we expressed the  
23 fluorescent  $\text{Ca}^{2+}$  indicator GCaMP6f in layer 2/3 neurons using viral vectors and imaged the responses with two-photon  
24 microscopy through a chronic cranial window (**Fig. 1C,D**). The location of fS1 was identified by intrinsic signal imaging  
25 (**Fig. 1D**). We found that different vibration frequencies reliably evoked transient increases in fluorescence of a subset of  
26 imaged neurons (**Fig. 1E,F**). Since the size of fluorescence transients is positively correlated with the number of spikes in  
27 a burst (Chen et al., 2013) we took the fluorescence change relative to baseline ( $\Delta f/f_0$ ) as a proxy for spike rate. By  
28 observing the activity of individual neurons, it became evident that different stimulus frequencies did not evoke equal  
29 responses (**Fig. 1F**), suggesting that fS1 neurons carry information about vibration frequency in the number of spikes  
30 they fire.

31  
32 To explicitly test the latter hypothesis, we computed the stimulus-specific information (SSI) as a measure of frequency  
33 encoding by the evoked  $\Delta f/f_0$  responses (Butts, 2003; Butts and Goldman, 2006). The majority of responding neurons  
34 (>85% of 725 cells, 19 mice, 42 fields of view) were found to be informative about frequency (i.e. had responses with  
35 significant SSI,  $p < 0.01$ , permutation test), which is in stark contrast to the 3% of neurons in the primate S1 responding to  
36 fingertip vibrations in the same frequency range (Harvey et al., 2013). To characterize their frequency dependent tuning,  
37 mean responses were fit with a descriptive function (**Fig. 2A-H**). Strikingly,  $\approx 49\%$  (303 of 621 informative cells) had  
38 identifiable tuning curve peaks (**Fig. 2A-D,I**) and thus had a preferred frequency of tactile vibration, which is analogous  
39 to a fundamental property of auditory cortex neurons: frequency selectivity (Cheung et al., 2001; Issa et al., 2014;  
40 Joachimsthaler et al., 2014). The remaining neurons were characterized by frequency dependent response increases-to-  
41 plateau or monotonic increases (**Fig. 2E-H,I**).

1 We next assessed the effects of vibration amplitude on frequency tuning. As vibration amplitude was attenuated, a shift  
2 of the tuning curves toward higher frequencies was observed (**Fig. 2J,K**). Also, by reducing the actuator displacement,  
3 the range of frequencies that could be generated by the hardware was extended to 1990 Hz. As such, neurons  
4 characterized as having increases-to-plateau responses at the highest amplitude were found to also be frequency  
5 selective when tested over an extended frequency range with smaller displacements (**Fig. S2**). Based on the descriptive  
6 function fits, we identified neurons that are tuned to a preferred frequency at any of the three tested displacements.  
7 The distributions of their preferred values confirm that fS1 neurons best respond to higher frequencies at smaller  
8 stimulus amplitudes (**Fig. 2L**). The observed amplitude dependent changes in tuning (**Fig. 2J,K, Fig. S2**) are analogous to  
9 how frequency selective responses of auditory cortex neurons change as a function of sound level (Sutter, 2000).

### 11 *Frequency selective neurons operate as feature detectors*

13 What might be the functional relevance of frequency selective tuning of fS1 neurons? Do these neurons signal the  
14 presence of a vibratory stimulus at their preferred frequency (i.e. operate as feature detectors) or is their role to  
15 differentiate stimuli based on their spectral content (i.e. perform frequency discrimination)? Modeling work has  
16 suggested that this question can be answered by analysing what the most informative region of the turning curve is  
17 (Butts and Goldman, 2006). On the curve's flanks, where the slope is steepest, discrimination is best as small changes in  
18 stimulus value produce large changes in neural activity. At the curve peak, discrimination becomes worse as the slope is  
19 near zero, but the peak firing rate is most distinguishable from baseline activity and thus makes the preferred frequency  
20 distinct from all others. Using the SSI measure to identify the most informative stimuli, model neuron simulations  
21 demonstrate that as noise (i.e. the trial-to-trial variability in neural responses) increases, maximal SSI transitions from  
22 the tuning curve's flank to its peak (Butts and Goldman, 2006). We therefore computed the SSI for all neurons with  
23 frequency selective tuning at any amplitude. The obtained results show that fS1 neurons convey maximum information  
24 at their preferred frequency (**Fig. 3**) and therefore operate, just like neurons in auditory cortex (Montgomery and Wehr,  
25 2010), in a high-noise regime as feature detectors.

### 27 *fS1 neuronal spikes are not cyclically entrained by forepaw vibrations*

29 At the periphery, each cycle of a sinusoidal oscillation applied to the skin typically evokes one or more phase-locked  
30 spikes in mechanoreceptor afferents (Mackevicius et al., 2012; Talbot et al., 1968). It follows that spike rate  
31 monotonically increases with vibration frequency up to the afferent's best frequency. At the cortical level, in S1 neurons  
32 representing the primate hand (Harvey et al., 2013; Mountcastle et al., 1969) and rodent whiskers (Ewert et al., 2008),  
33 the cycle-to-cycle tracking of the vibration is lost but phase-locked entrainment of spikes persists. Spectral information is  
34 therefore only encoded in their temporal spiking patterns and not anymore in firing rates. Given our finding that  
35 frequencies are encoded in firing rates in fS1 when substrate vibrations are applied to the forelimb, we wondered  
36 whether phase-locked spiking also exists. To address this, we measured stimulus-related spiking with juxtacellular (37  
37 units, 6 mice) or extracellular (17 units, 6 mice) electrode recordings using identical conditions as in imaging experiments  
38 (**Fig. 2A and Fig. S3A**). We found frequency dependent increases (43 units, **Fig. S3B-G**), but also decreases (11 units, **Fig.**  
39 **S3H,I**) in spike rates, with a similar heterogeneity of tuning curves as inferred from the imaged calcium fluorescence. For  
40 the rate increasing units, we measured whether a preferred phase of spike occurrence in the stimulus cycle exists (**Fig.**  
41 **4B**). Phase distributions did not reveal significant phase-locked spiking (**Fig. 4C**) at any frequency (Rayleigh test for non-  
42 uniformity of circular data,  $p < 0.01$  for 1 out of 43 units at most). To control for possible variability in onset delays across  
43 stimulus repetitions, we also computed inter-spike-intervals whose distribution should peak at integer multiples of the

1 stimulus period in the case of phase-locked spiking. At any stimulus frequency, the null hypothesis that standardized  
2 inter-spike-intervals (see Methods) come from a uniform distribution (**Fig. 4C**) could be rejected for at most 1 out of the  
3 43 units ( $\chi^2$  test,  $p < 0.01$ ). We therefore speculate that a transformation of neural coding, analogous to that in the  
4 auditory system (Saal et al., 2016), occurs between peripheral and central processing of stimuli vibrating the mouse  
5 forelimb, where phase-locked spiking progressively dissipates along the ascending pathway and turns into a pure rate  
6 code in the cortex.

#### 7 8 *Responses are not driven by auditory cues*

9  
10 The striking similarity to response properties of auditory neurons raises the possibility that airborne sounds, produced  
11 by the piezoelectric stack actuator generating the vibratory stimulus, drive activity in fS1 neurons. Alternatively, the  
12 substrate vibrations might propagate through the bones to the inner ear (Rado et al., 1998; Reuter et al., 1998). Auditory  
13 tones are known to alter the perception of tactile stimuli in a frequency-specific manner (Crommett et al., 2017; Yau et  
14 al., 2009) and might hence indeed drive activity in the somatosensory cortex. To test for these possibilities, we placed  
15 the forepaw away from the stimulator or saturated the ear with white noise, and compared the responses to those  
16 evoked by normal control conditions in the same experimental sessions. With the forepaw placed off the stimulator (113  
17 cells, 9 mice), sound alone could not activate, at any frequency, the neurons normally responsive to vibratory  
18 stimulation. Masking hypothetical inner ear vibrations with white noise (128 cells, 9 mice) caused only small changes in  
19 the evoked responses (**Fig. S4**), probably due to the averseness of the loud sound. These results demonstrate that the  
20 auditory system is not implicated in the frequency tuning of fS1 neurons. Additional experiments in which mice were  
21 trained to perform reach-to-grasp forelimb movements (**Movie S2**) allowed us to exclude hypothetical stimulus-locked  
22 motor events such as muscle twitches, increases in stiffness or proprioceptive inputs (**Fig. S5**).

#### 23 24 *Pacinian corpuscles are absent in the glabrous skin of the mouse forepaw*

25  
26 In mammals, high frequency vibrations are transduced by a subtype of rapidly adapting mechanoreceptors, the Pacinian  
27 corpuscles (PCs) (Abraira and Ginty, 2013). PCs can be found in many body locations near joints, ligaments, tendons and  
28 bones (Bell et al., 1994; Zelena, 1994), but they most prominently populate the glabrous skin of fingertips and palm of  
29 the primate hand (Kumamoto et al., 1993a). Is it possible that the cortical coding scheme for substrate vibration  
30 frequency, reported here, originates from the recruitment of a functional network of PCs different to that recruited in  
31 the primate hand by local cutaneous vibrations?

32  
33 To address this question, we performed a detailed histological analysis of PC distribution in the mouse forelimb. PCs  
34 were identified in hematoxylin and eosin stained sections of the distal limb based on their stereotypical lamellar  
35 morphology (Kumamoto et al., 1993a; Kumamoto et al., 1993b). Unlike in the primate hand, we were unable to find PCs  
36 in the dermis of the glabrous forepaw skin (**Fig. S6**), which confirms previous observations (Fleming and Luo, 2013).  
37 However, PCs were systematically found in deep tissue next to bones in the fingers and palm, but also more proximally  
38 next to the radius and ulna (**Fig. 5**). This finding suggests that the cortical responses reported here originate not from the  
39 activation of dermal but rather of a population of deep PCs.

#### 40 41 *Responses are specific to mechanoreceptor activation in the distal forelimb*

1 To causally link the frequency tuning observed in fS1 to the activation of mechanoreceptors in the distal forelimb we  
2 conducted two additional experiments. First, we blocked nerve transmission from the forepaw by injecting lidocaine at  
3 the wrist level and compared the evoked activity to the pre-injection control period (83 cells, 8 mice). The induced  
4 changes were compared to the effects of saline injections performed either the following or previous day with the same  
5 neurons. The significantly higher reduction of the evoked responses with lidocaine (**Fig. 6A**) suggests the involvement of  
6 mechanoreceptors in the wrist/forepaw in driving the imaged neurons. However, the nerve block did not uniformly  
7 reduce responses across the entire frequency range (**Fig. 6B-D**). This frequency-dependent effect might be analogous to  
8 tuning curve changes observed when vibration intensity is reduced (**Fig. 2J-L and Fig. S2**). Alternatively, the substrate  
9 vibrations are likely to propagate to and activate mechanoreceptors in other parts of the forelimb (**Fig. S5**) or even in  
10 more distant organs (Bell et al., 1994; Zelena, 1994). The residual responses after lidocaine injection might thus reflect  
11 their frequency selective contribution that converges together with that of mechanoreceptors in the wrist/forepaw on  
12 the same cortical fS1 neurons.

13  
14 In a second set of experiments, we expressed the optogenetic actuator Channelrhodopsin-2 selectively in a subset of  
15 mechanoreceptors associated with rapidly adapting afferents. Pacinian and Meissner corpuscles and their innervating  
16 neurons were targeted using a double-transgenic strategy (ETV1-Cre x ChR2-EYFP, see Methods). Two-photon  $\text{Ca}^{2+}$   
17 imaging of fS1 activity was performed while either vibrotactile, optogenetic (**Movies S3,S4**) or single-point touch (see  
18 Methods) stimuli were delivered to the contralateral forepaw. Pulsed illumination of the forepaw with an optic fiber  
19 evoked highly reliable  $\Delta f/f_0$  increases in a subset of cortical fS1 neurons (20 cells, 2 mice, 3 fields of view) (**Fig. 7A-C and**  
20 **Fig. S7A**). We grouped trials with similar paw placement relative to the optic fiber by applying a dimensionality reduction  
21 technique, t-distributed stochastic neighborhood embedding (t-SNE) (van der Maaten and Hinton, 2008a), to forepaw  
22 images at the time of stimulus onset (**Fig. S7B**). This classification revealed that the fS1 neurons were preferentially  
23 activated by illumination of specific locations on the forepaw (**Fig. 7A-C and Fig. S7C-E**). Some of the same neurons also  
24 responded to either vibration (**Fig. 7A**) or single-point touch (**Fig. 7B,C**). In sum, our vibratory stimuli were found to drive  
25 cortical neurons intermingled and partially overlapping with those responding to touch of the forepaw and to selective  
26 optogenetic activation of its mechanoreceptor afferents (**Fig. 7D**). This result supports the assertion that the frequency  
27 selective fS1 neurons, reported here, reflect the processing of substrate vibrations acting upon mechanoreceptors of the  
28 distal forelimb.

## 29 30 Discussion

31  
32 We have shown that vibrating the mouse forelimb with pure sinusoidal displacements evokes auditory-like responses in  
33 somatosensory cortex neurons: frequency selective spike rates and absence of cyclical spike entrainment. Both of these  
34 findings are at odds with previous reports of how S1 neurons code for the frequency of tactile vibration applied to a  
35 single point on the skin (e.g. at fingertips) (Harvey et al., 2013; Mountcastle et al., 1969). How can this discrepancy be  
36 explained?

37  
38 Localized oscillatory indentations of the skin surface constitute ecologically relevant vibrotactile sensations for primates,  
39 which might occur during active tactile exploration. The associated sensation is most likely conveyed to the central  
40 nervous system by dermal PCs that densely populate the primate fingertips (Kumamoto et al., 1993a). On the contrary,  
41 we found no evidence that dermal PCs exist in the mouse forepaw (**Fig. 5 and Fig. S6**), which has been previously  
42 reported (Fleming and Luo, 2013). This finding might also support the view that rodents principally use their whiskers  
43 rather than their paws for active tactile exploration (Diamond et al., 2008) (but see (Manita et al., 2015; Maricich et al.,

2012)). Forepaw-based vibration sensation in rodents might thus take the role of passive “listening” through the substrate as the communication medium (Hill, 2008). The activation of deep, subcutaneous PCs populating the distal forelimb at large might synergistically participate in processing the vibratory stimuli. The associated activity in the multiple afferent channels might be individually filtered and eventually converge onto cortical neurons with frequency selective spike rates. The frequency-dependent effect of our pharmacological experiments (**Fig. 6**) and the absence of a one-to-one correspondence between neurons driven by selective afferent activation and forepaw vibration (**Fig. 7D**) are consistent with this hypothesis. On the other hand, localized skin vibrations in primate fingertips drive cortical neurons with firing properties corresponding more closely to those of individual dermal PC afferents (Mackevicius et al., 2012; Talbot et al., 1968).

Besides the difference in receptor distribution found between the mouse and primate, we can ask more generally: do the two different spectral information coding schemes (rate code vs. cyclical entrainment) have different functional implications? We speculate that they might reflect a fundamental difference between active and passive sensing. Active somatosensory systems need to take the kinematics of the active motion into account when extracting low-level stimulus features. Such timing dependent sensory-motor integration might therefore explain temporally precise coding in the cortex, as described by cyclical spike entrainment for example (Ewert et al., 2008; Harvey et al., 2013; Mountcastle et al., 1969). Instead, cortical feature-selective rate coding in the primate fingertip or the rodent whisker systems have most likely evolved to identify macroscopic object features like surface texture (Garion et al., 2014; Isett et al., 2018) or edge orientation (Bensmaia et al., 2008), independently of motion kinematics. On the other hand, passive sensory systems, such as hearing or sensing substrate vibrations do not rely on active motion and have most likely evolved to directly identify and discriminate lower level physical parameters like frequency or pitch using a tuned rate code (Eggermont, 2001). This distinction is directly supported by psychophysical experiments comparing how humans perceive the spectral information of sound and skin vibrations (Formby et al., 1992). However, both coding schemes are probably highly overlapping and might even use the information of the same receptors, yet via segregated circuits. Future experiments will be necessary to investigate if such parallel coding systems exist, for example at the level of the primate hand.

Interestingly, we found that the responses to forelimb vibrations described here not only share many features with the auditory system, the frequency range represented (100 Hz to 1.5 kHz, **Fig. 2L**) is also surprisingly complementary to the auditory hearing range of the mouse (4kHz to 50kHz) (Koay et al., 2002). The passive sensing of substrate vibrations might thus be a natural extension of the mouse auditory system to the lower, inaudible frequency range. Actually, it has been proposed that communication via airborne sounds might have evolved from the more ancient precursor modality based on substrate-borne vibration signaling (Hill, 2008). Many insect species communicate exclusively by emitting and sensing substrate vibrations (Cocroft and Rodríguez, 2005) while in others, the same sensory organ, such as the Johnston’s organ in drosophila, is used to detect both sound and touch (Azevedo and Wilson, 2017). Vestiges of this modality seem to be still present in rodents, given that Ehrenberg’s mole-rats vibrate their subterranean tunnels to communicate with conspecifics (Heth et al., 1987; Rado et al., 1987), and might explain the parallels that we found between frequency coding in auditory and somatosensory systems.

In conclusion, our work reveals a novel and robust neural representation of vibration frequency in the somatosensory cortex. The remaining challenge is to understand the mechanisms by which this cortical representation emerges from activations of peripheral mechanoreceptors along the ascending pathway. Similarly to recent experiments of primary afferents in the whisker system (Severson et al., 2017), we developed an optogenetic tagging strategy to selectively

1 activate rapidly adapting mechanoreceptor afferents in the forepaw. We were furthermore able to identify the neurons  
2 that this peripheral optogenetic activation drives in the cortex and compare them to those activated by natural tactile  
3 stimuli (**Fig. 7**). These experiments therefore pave the way for resolving the above posed challenge and, more generally,  
4 for future studies to illuminate the functional contribution of a given sensory receptor to cortical processing of sensory  
5 information.

## 7 **Acknowledgments**

8 We thank Vincent Hayward and Sliman Bensmaia for their advice and comments on the manuscript, Robert Zimmerman  
9 and Gregorio Galinanes for help with histology, Sylvain Crochet for advice on the electrophysiology experiments and  
10 Claudia Bonardi for help with training mice on the forelimb reaching task. This work was supported by the Swiss National  
11 Science Foundation (PP00P3\_133710), the European Research Council (OPTOMOT), the New York Stem Cell Foundation  
12 and the International Foundation for Paraplegia Research. D.H. is a New York Stem Cell Foundation-Robertson  
13 Investigator.

## 1 Figures

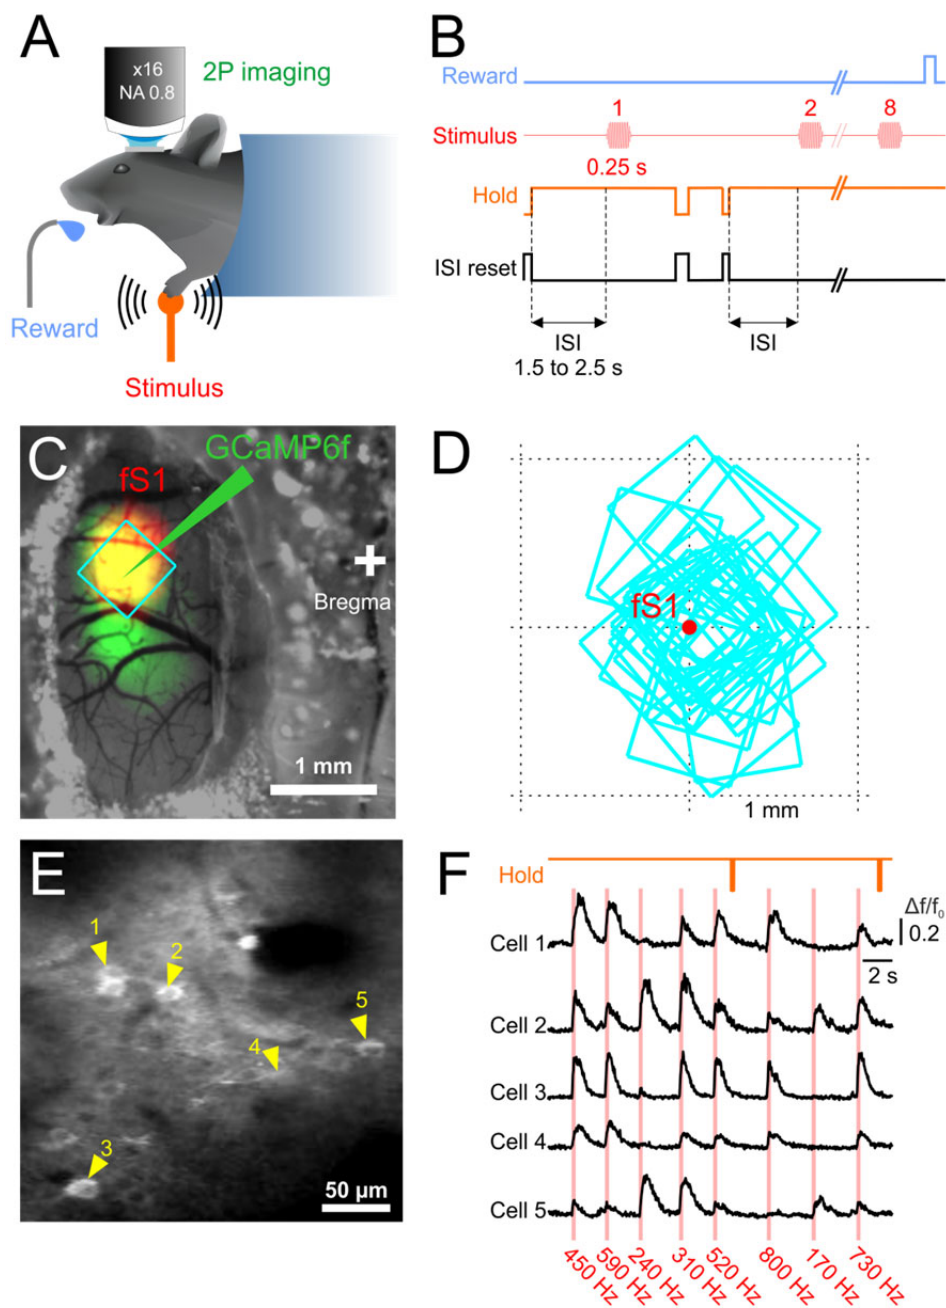

2

### 3 **Figure 1. Two-photon $\text{Ca}^{2+}$ imaging of forepaw vibration related activity in somatosensory cortex of awake mice.**

4 **(A)** Experimental setup schematic. **(B)** "Trial" timeline in which eight successive vibrotactile stimuli were delivered  
5 followed by reward. The variable inter-stimulus-interval (ISI) was reset upon forepaw release thereby ensuring contact  
6 with the stimulator at stimulus onset and incentivised continuous holding for higher reward rates. **(C)** Dorsal view of the  
7 cranial window showing the expression patterns of GCaMP6f (green), the intrinsic signal (red) of contralateral forepaw  
8 stimulation (fS1: forelimb somatosensory cortex) and the location of the imaging field-of-view (FOV, cyan square). **(D)**  
9 Locations of imaging FOVs (cyan squares) relative to the intrinsic signal center-of-mass of fS1 (red) of all experiments (19  
10 mice, 42 FOVs). **(E)** Cropped in-vivo image of GCaMP6f expressing cells in fS1 with five neurons (yellow arrows)  
11 responsive to vibrotactile stimulation. **(F)** Imaged fluorescence changes in one "trial" of the five neurons shown in (E), in  
12 response to eight stimuli of different frequencies.



1

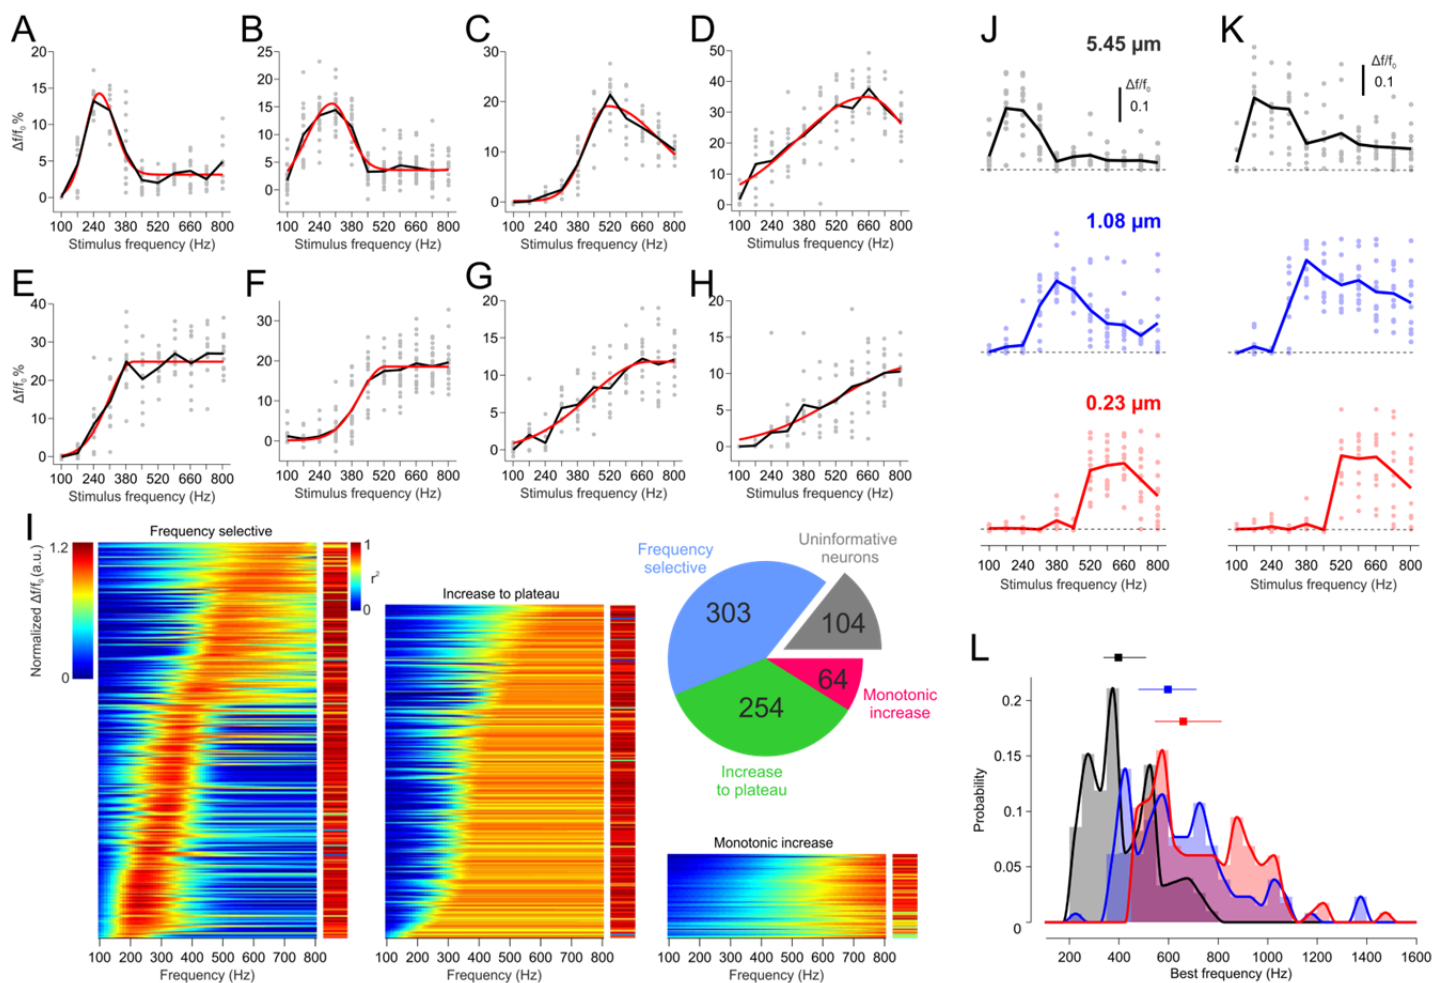

2

3

## Figure 2. Frequency selective tuning to vibration frequency in mouse fs1.

(A-D) Tuning curves of example frequency selective neurons (grey dots: individual stimulus responses, black lines: mean values, red lines: descriptive function fits). (E-G) Example neurons with increases-to-plateau tuning. (H) Example neuron with monotonic increase tuning. (I) Normalized tuning curve fits of all imaged neurons classified according to frequency selective, increases to plateau or monotonic increases with their respective goodness-of-fit measure ( $r^2$ ). The pie chart summarizes the number of neurons of each class, as well as those uninformative about stimulus frequency (i.e. with non-significant SSI). (J,K) Tuning curve changes of two example neurons as a function of vibration amplitude (dots: individual responses, lines: mean values). The black, blue and red tuning curves correspond to the same neuron tested at 5.45  $\mu\text{m}$ , 1.08  $\mu\text{m}$  and 0.23  $\mu\text{m}$  vibration amplitudes, respectively. (L) Distribution histograms of best frequencies of all neurons with frequency selective tuning for the three tested amplitudes (5.45  $\mu\text{m}$ : N=303 cells, 1.08  $\mu\text{m}$ : N=130 cells, 0.23  $\mu\text{m}$ : N=116 cells). Colors are as in (J,K) and lines are cubic interpolations of the histogram values. Squares with delimiters denote medians +/- quartiles.

16

17

18

19

20

21

22

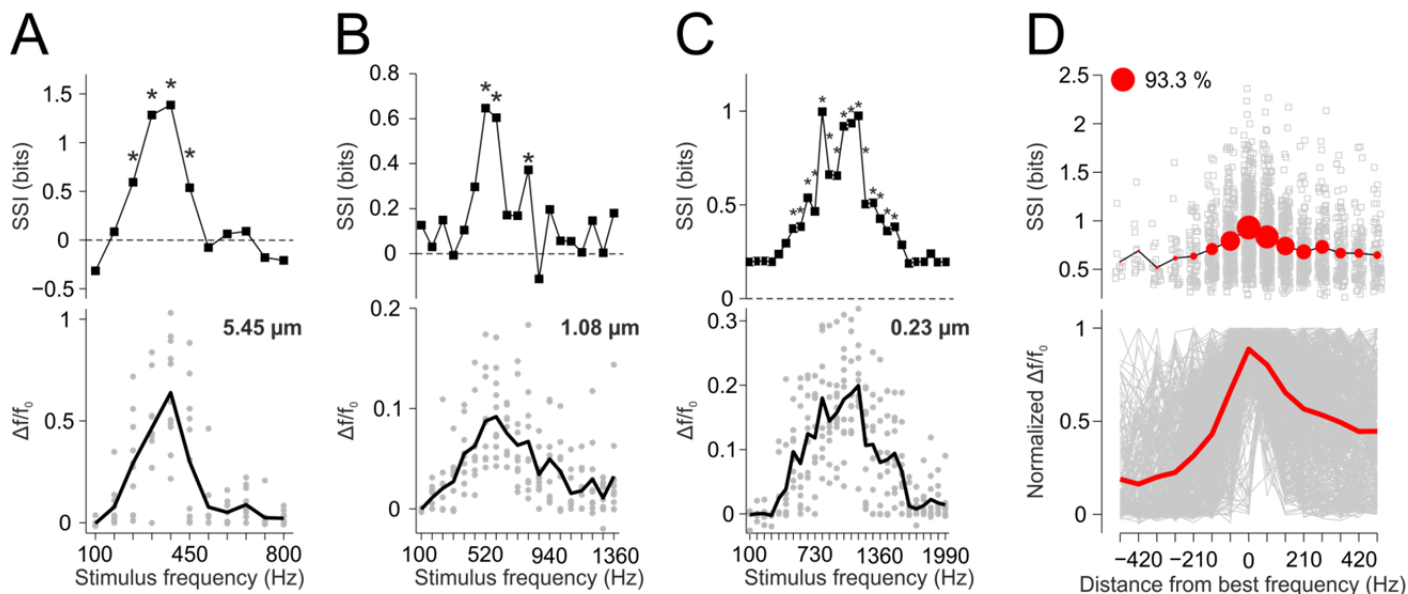

1  
2  
3  
4  
5  
6  
7  
8  
9

**Figure 3. Maximum information is conveyed at the tuning curve peaks.**

**(A-C)** Frequency tuning of three representative neurons (bottom) at indicated vibration amplitudes and their respective bias-corrected SSI (top) \*:  $p < 0.01$ , permutation test ( $n = 1999$  permutations). **(D)** Normalized tuning curves (grey) and the average (red) of all frequency selective neurons at any amplitude ( $N = 549$  cells) aligned to their best frequency (bottom) and the corresponding significant SSI values (grey squares), their mean (black line) and their proportions (red circle sizes) relative to the total number of neurons (top).

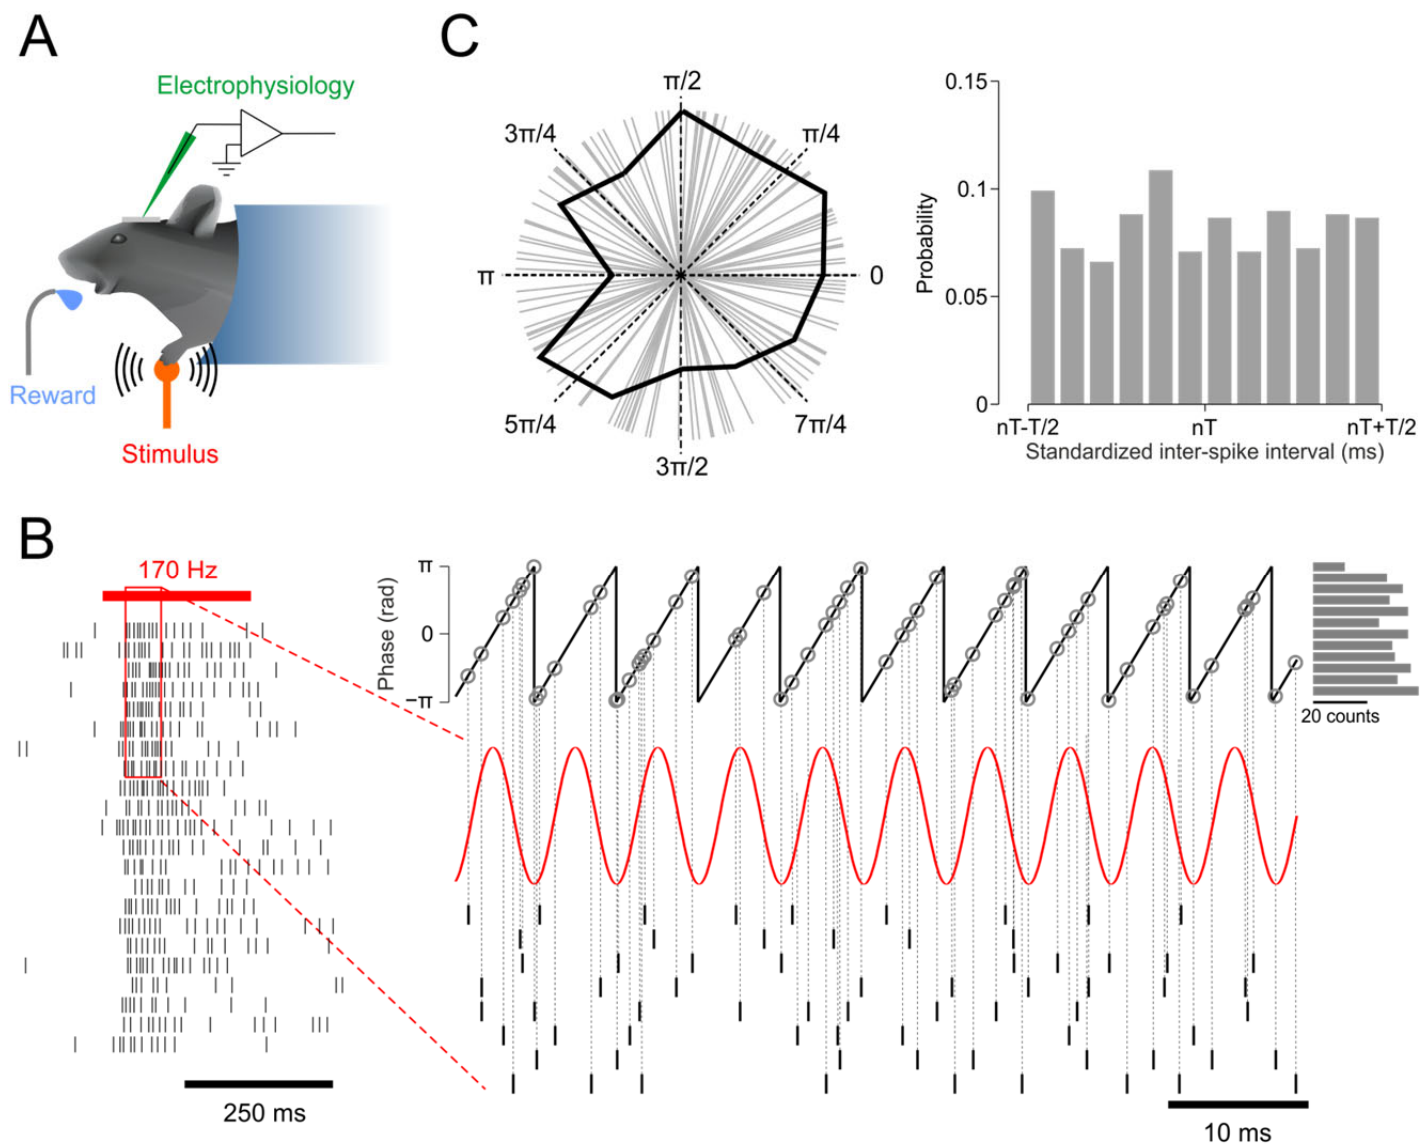

**Figure 4. The spikes of fS1 neurons are not cyclically entrained by the sinusoidal vibration.**

(A) Experimental setup schematic. (B) Spike raster plot of a neuron responding to a 170 Hz vibration. To test for phase-locked spiking, the distribution of phases of the stimulus wave at times of spike occurrences was computed as depicted, for each responding neuron and all frequencies. (C) Left: distribution of stimulus phases at spike times for a representative neuron at its best frequency (grey lines: phases of individual spikes, black contour: circular phase histogram). Rayleigh test for non-uniformity of circular data:  $p=0.395$ . Right: histogram of standardized inter-spike intervals of the same example neuron.  $\chi^2$  test for uniformity:  $p=0.1$ .

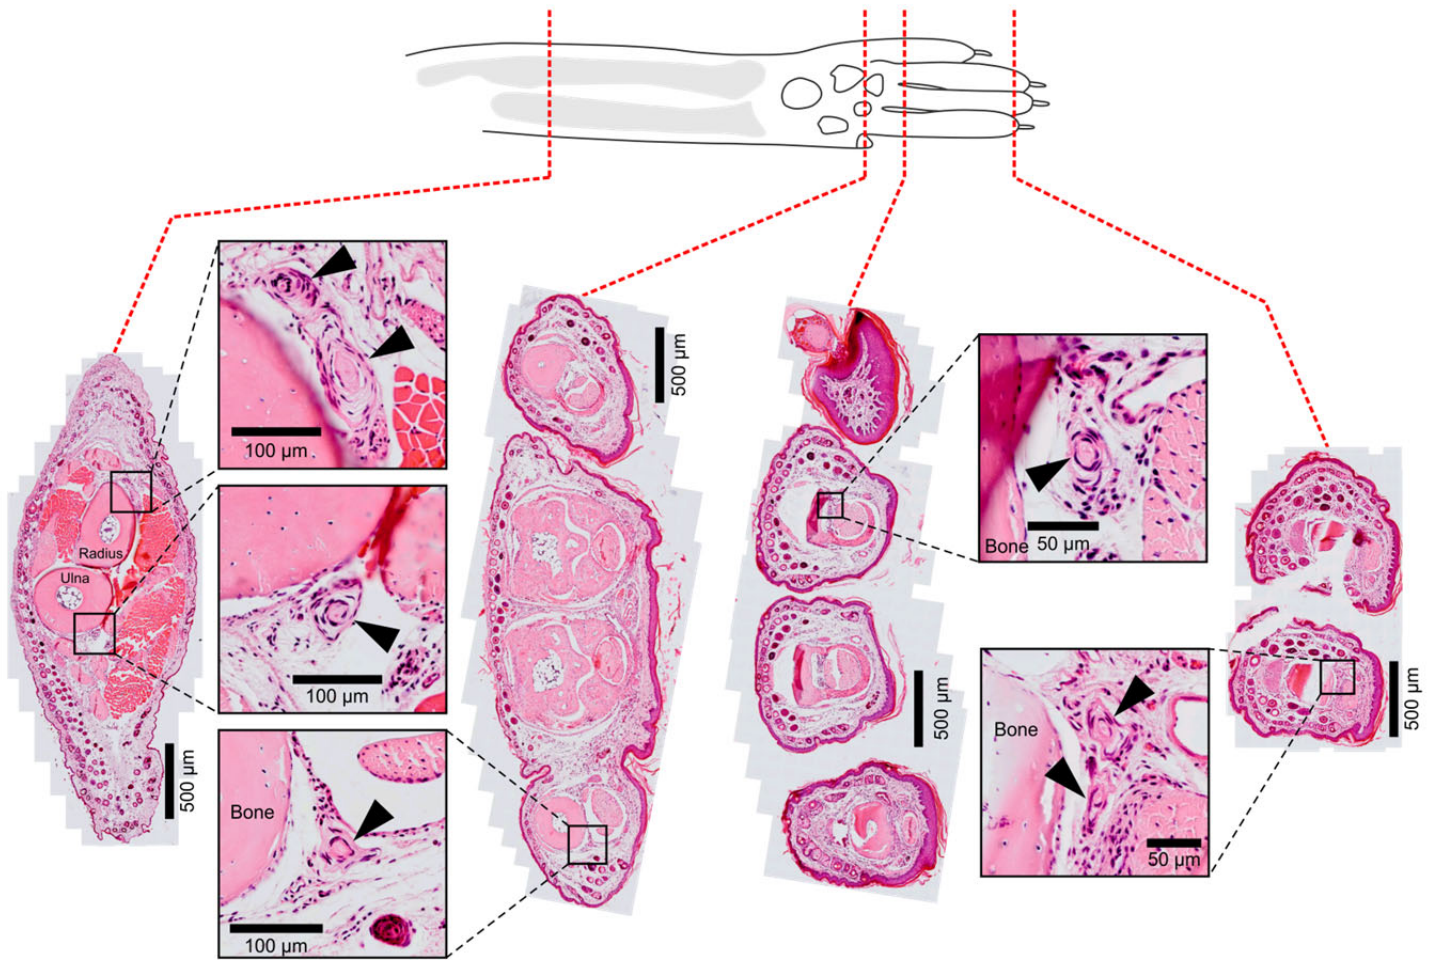

1  
2  
3  
4  
5  
6  
7

**Figure 5. Pacinian corpuscles are located subcutaneously in the mouse forelimb.**

Four transverse 5 µm sections (haematoxylin and eosin stained) of a mouse forelimb show Pacinian corpuscles (black arrows) located deep in subcutaneous tissue next to the bones of fingers and the radius/ulna. The Pacinian corpuscles were never found in the skin dermis.

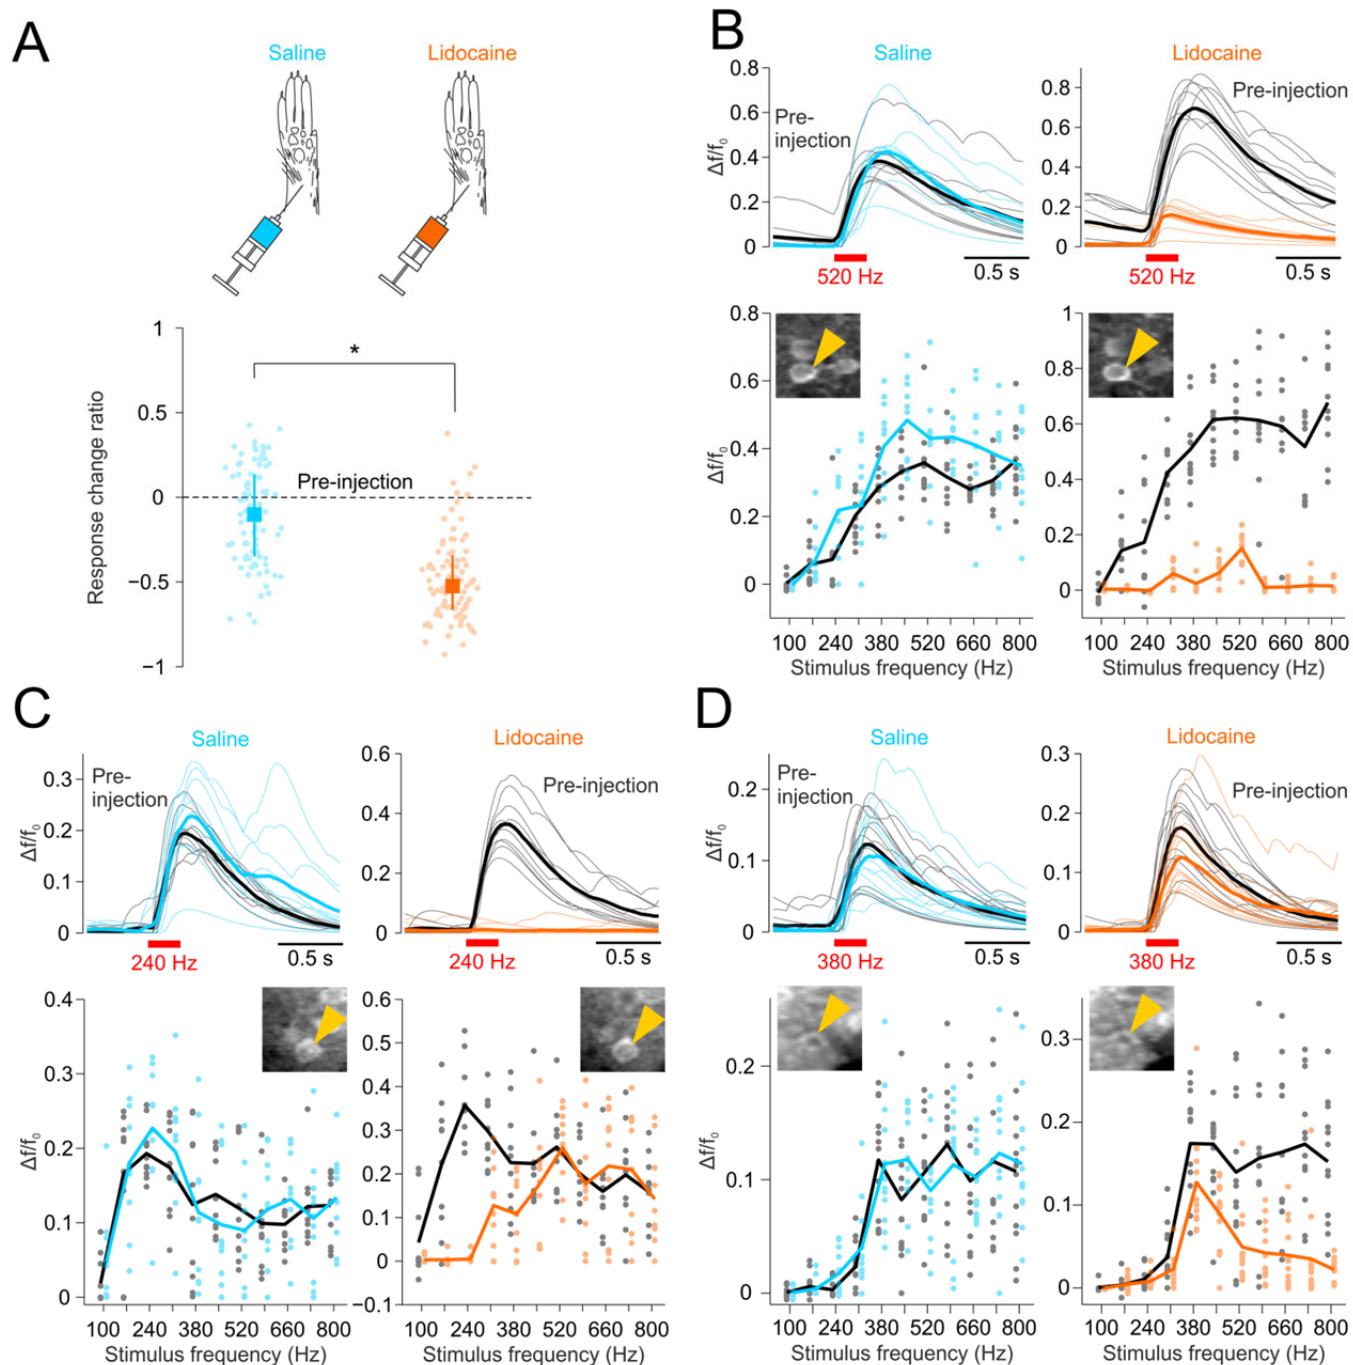

**Figure 6. Response specificity to forelimb stimulation tested with peripheral nerve blocking.**

(A) To test if the imaged neural responses were specific to vibrotactile stimulation of the forepaw, nerve transmission was blocked by lidocaine injection at the wrist level. Equal volume (50  $\mu$ L) saline injection was used as control. For each neuron, the response change ratio (median  $\pm$  quartiles,  $n=83$  cells, 8 mice) relative to pre-injection activity (zero level) was averaged across all frequencies with significant responses in the pre-injection period. \*:  $p < 10^{-12}$ , Wilcoxon signed-rank test. (B) Representative neuron showing suppressed responses across all tested frequencies after lidocaine (orange) but not saline (cyan) injection compared to pre-injection levels (black). Top: denoised  $\Delta f/f_0$  responses evoked by 520 Hz vibrations (thin lines: individual stimulus responses, thick lines: mean response). Bottom: frequency tuning curves (dots: individual responses, lines: mean response). Insets: cropped two-photon images showing that the same neuron was analyzed in both experiments (yellow arrow). (C,D) Same data as in (B) for two representative neurons showing suppressed responses in a restricted range of frequencies only.

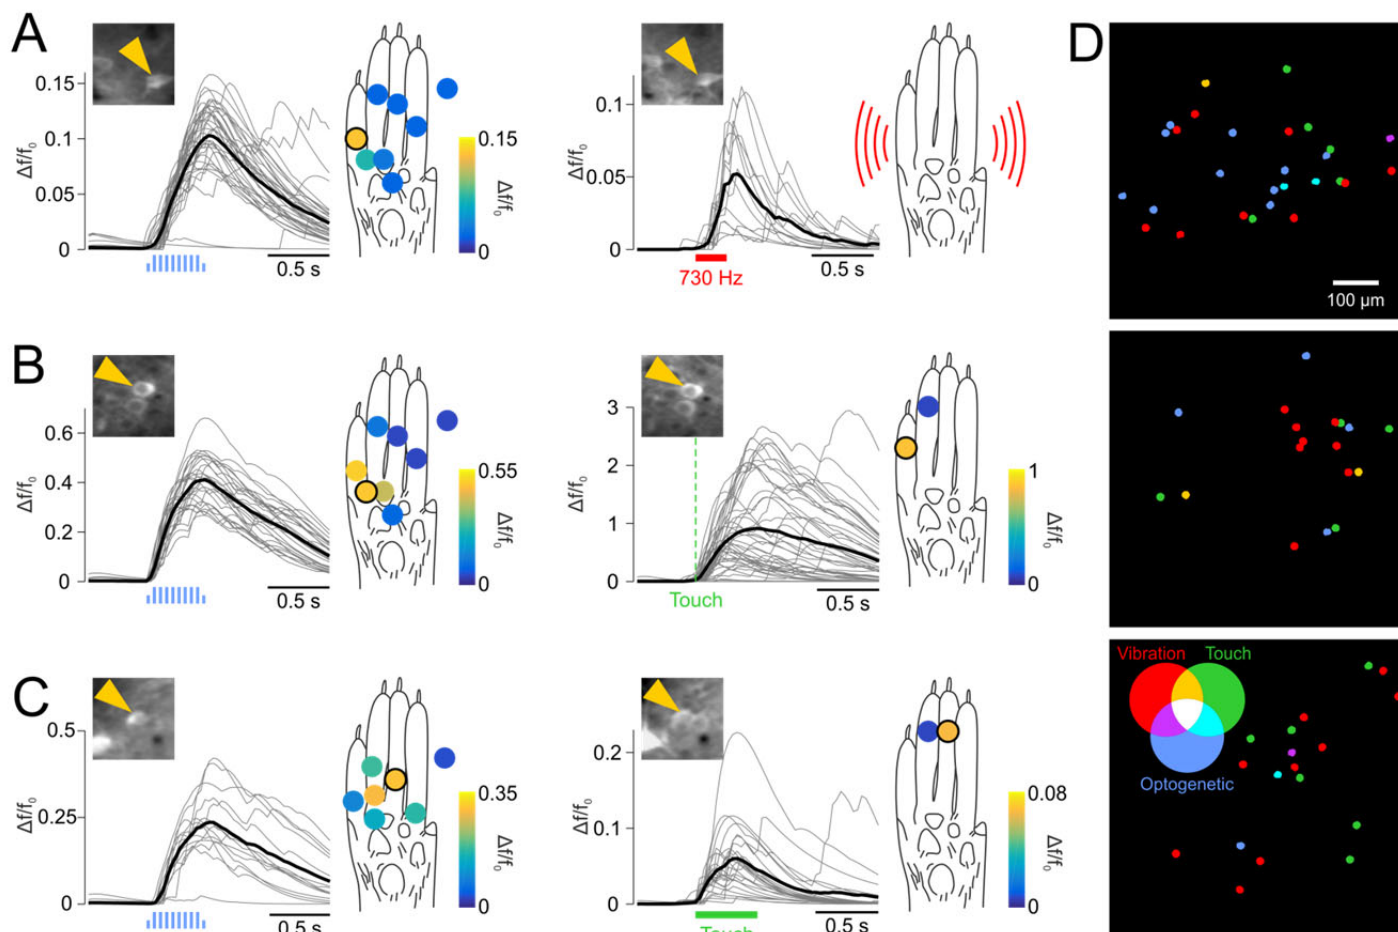

1  
2  
3 **Figure 7. Response specificity to forelimb stimulation tested with optogenetic tagging.**

4 **(A)** Example neuron in a double transgenic mouse activated by both optical stimulation (left) and vibration (right) of the  
5 forepaw. Filled circles indicate different stimulation locations and are color coded according to the average  $\Delta f/f_0$   
6 response. The depicted denoised  $\Delta f/f_0$  response traces correspond to the stimulus location with the black outline and  
7 the 730 Hz vibration (thin lines: individual stimulus responses, thick lines: mean response). Insets: cropped two-photon  
8 images showing that the same neuron was analyzed in both experiments (yellow arrow). **(B,C)** Same data as in (A) for  
9 two example neurons activated by both the optical stimulation and either manual (B) or automatized (C) single point  
10 touch. The black  $\Delta f/f_0$  traces correspond to touch locations (filled black circles) from which significant responses could be  
11 evoked. The orange traces and symbols correspond to control touch locations. **(D)** The distribution of neurons within  
12 three imaged FOVs (2 mice) with significant responses to either optogenetic, vibration or touch stimuli, or any  
13 combination of the three as indicated by the color code.

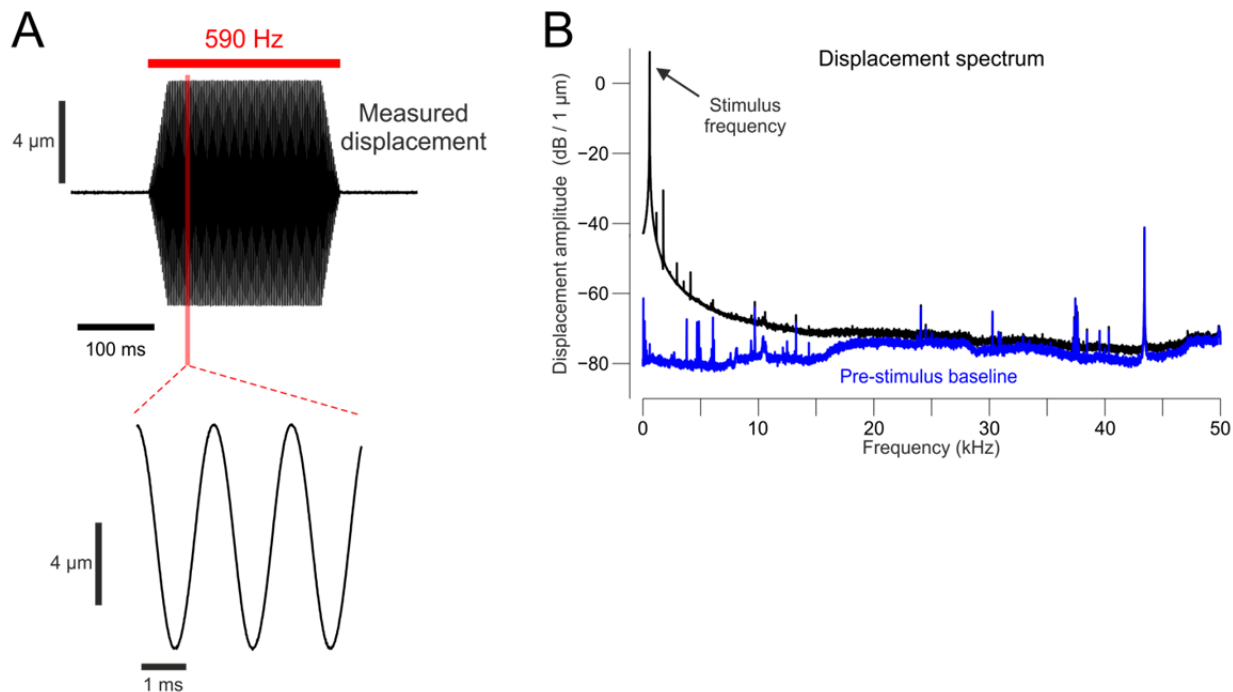

**Figure S1. Spectral analysis of measured displacement produced by the vibrotactile stimuli.**

**(A)** Example of a displacement measured by the stimulator's strain gauge (black) of a single 590 Hz vibration. The bottom trace shows an expansion in time of the interval highlighted in red. **(B)** Amplitude spectrum of the displacement produced by the 590 Hz stimulus indicates that the physical vibration consisted of a single frequency component (i.e. was a pure sinusoid). Components apparent at higher frequencies were highly attenuated relative to the stimulation frequency and were for the most part continuously present as revealed by the signal spectrum of the pre-stimulus baseline period (blue). Analogous amplitude spectra were obtained for stimuli at all other tested frequencies and amplitudes.

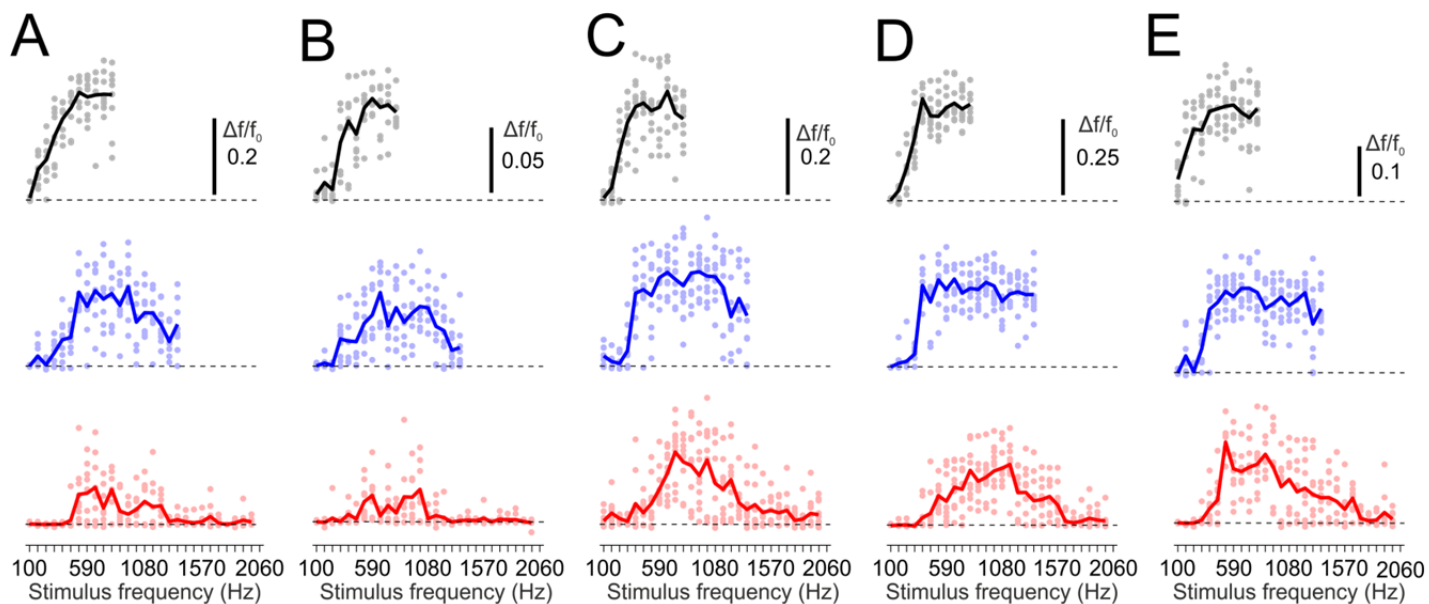

**Figure S2. Tuning curves change with vibration amplitude.**

**(A-E)** Tuning curves changes and extension of the tested frequency range of five example neurons as the vibration amplitude is attenuated from 5.45 μm (black) to 1.08 μm (blue), to 0.23 μm (red).

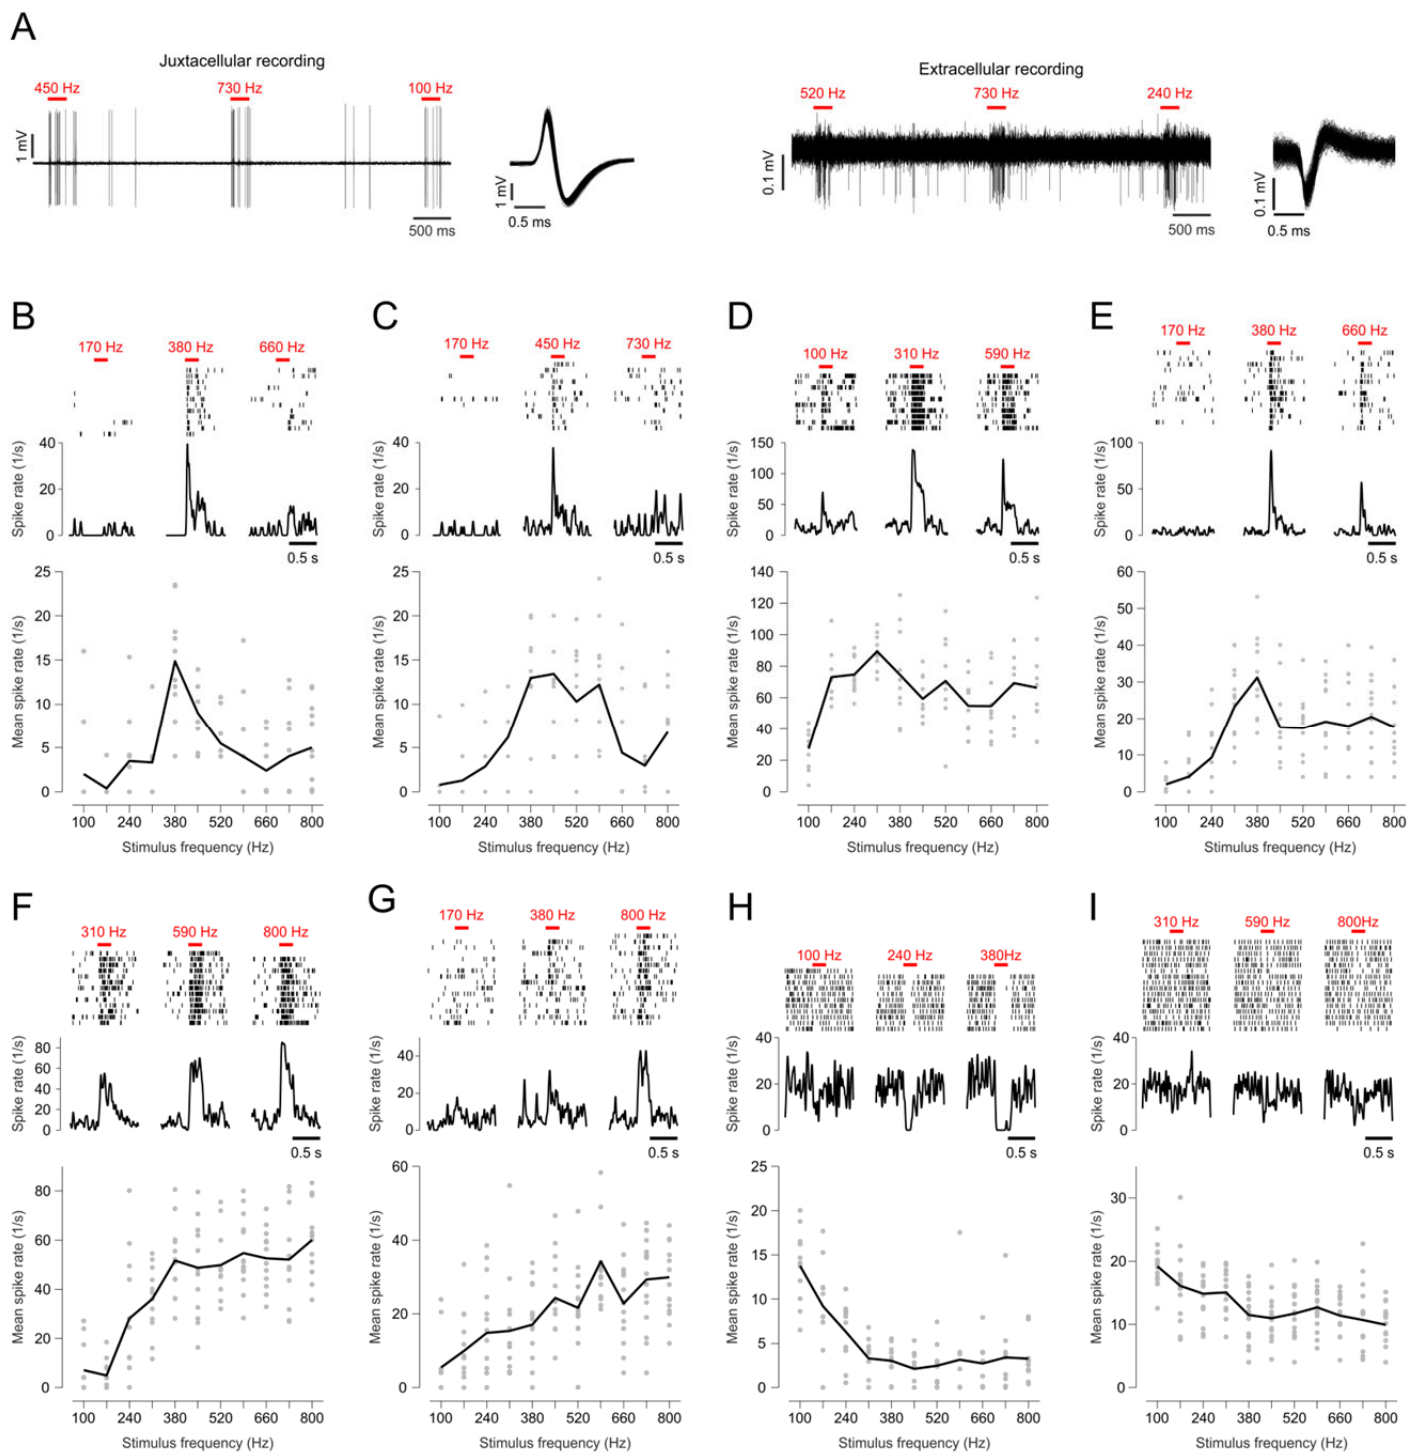

1  
2 **Figure S3. Electrode recordings of vibrotactile responses in fs1.**

3 **(A)** Examples of activity traces and action potentials recorded juxtacellularly and extracellularly in response to forepaw  
4 vibrations. **(B-I)** Spike rasters (top) and spike rate estimates (middle) of representative units recorded in fs1 in response  
5 to three chosen stimulus frequencies with their complete tuning curves based on the evoked mean spike rates (bottom).  
6



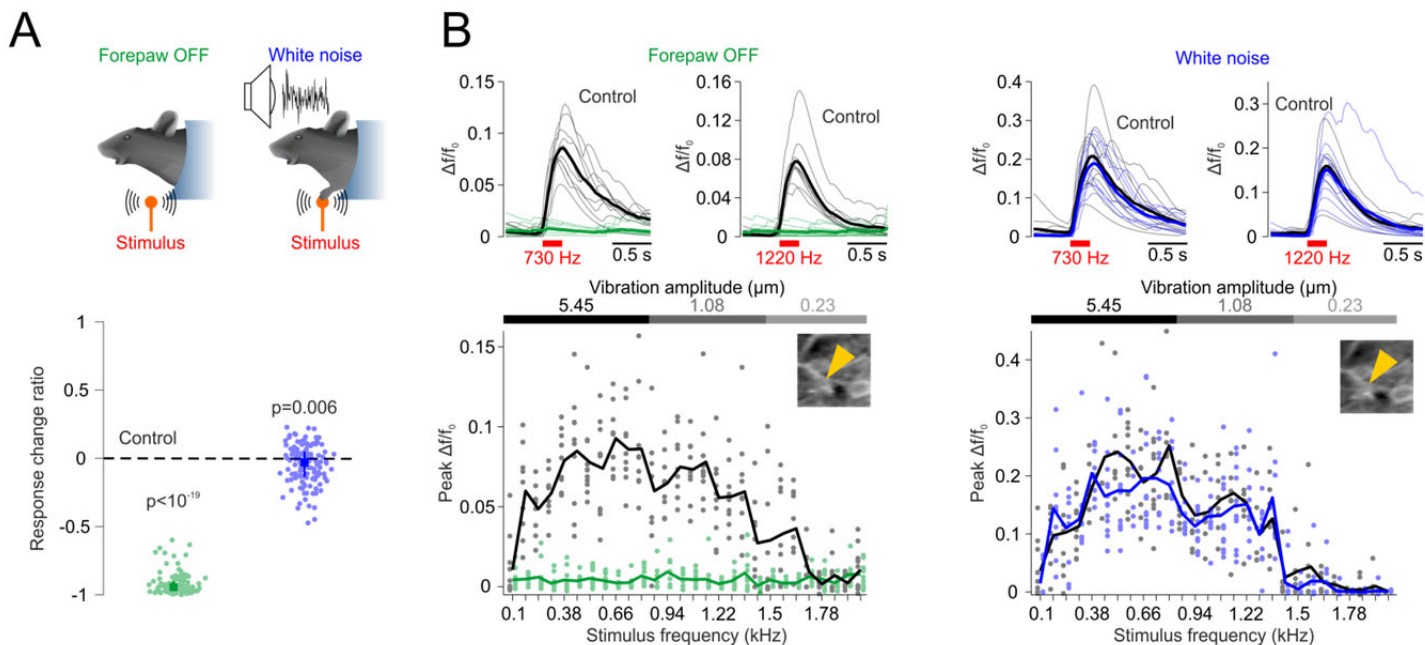

**Figure S4. Absence of auditory responses in imaged neurons.**

**(A)** To test for the possibility that airborne sounds activated the imaged neurons in fS1, the forepaw was moved off the stimulator. To test for the possibility that vibrations propagated through the body to the cochlea, loud white noise was used to mask this hypothetical stimulation. The response change ratios (median  $\pm$  quartiles) relative to the control condition (zero level) averaged across all frequencies with significant activity increases in the control condition show that with the forepaw off the stimulator, sound alone could not drive increases in  $\Delta f/f_0$  ( $p < 10^{-21}$ , Wilcoxon signed-rank test,  $n = 113$  cells, 9 mice) and that the white noise mask had but a small aversive effect on the responses ( $p = 0.006$ ,  $n = 128$  cells, 9 mice). Significant  $\Delta f/f_0$  increases in none of the individual neurons could be evoked by sound alone at any frequency ( $p < 0.01$ , randomization test,  $n = 1999$  repetitions). **(B)** A representative fS1 neuron activated by forepaw vibrations (black: control condition) was irresponsive to sound alone (green: forepaw off condition) and unaffected by the auditory mask (blue: white noise condition). Top: denoised  $\Delta f/f_0$  responses evoked by 730 Hz and 1220 Hz vibrations (thin lines: individual stimulus responses, thick lines: mean response). Bottom: frequency tuning curves tested with four different vibration amplitudes, as depicted by the greyscale bar, to cover the extended range of frequencies (dots: individual responses, lines: mean response). Inset: cropped two-photon image depicting the same responding neuron in both conditions (yellow arrow).



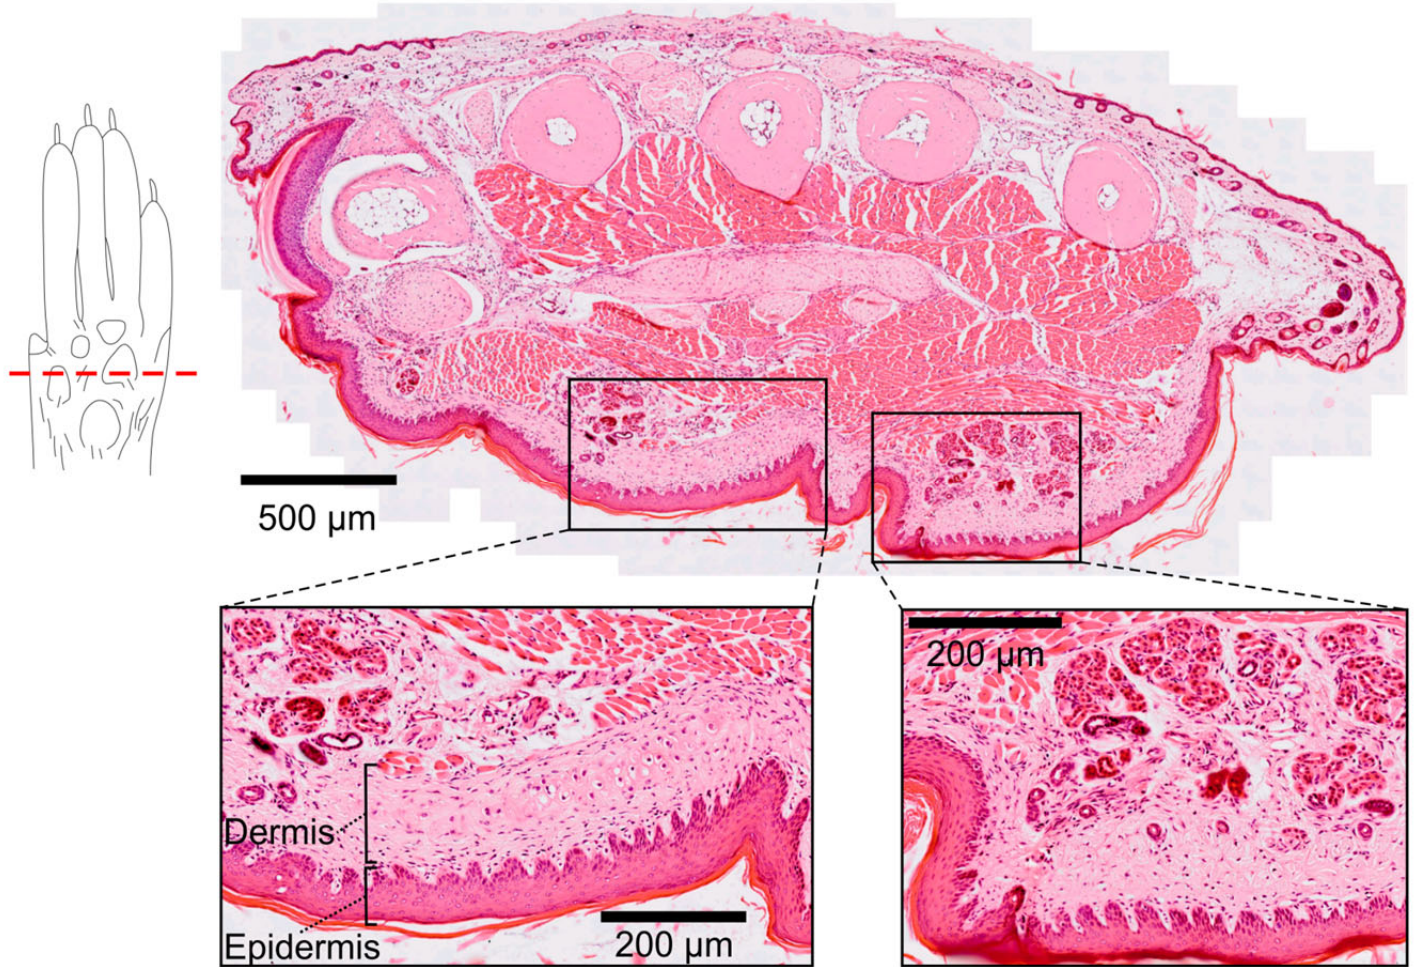

1  
2  
3  
4  
5

**Figure S6. Absence of Pacinian corpuscles in the dermal layer of forepaw pads.**

A transverse 5 μm section (haematoxylin and eosin stained) of a mouse forepaw. The magnified panels show the absence of Pacinian corpuscles in the dermal layer of the palm pads.

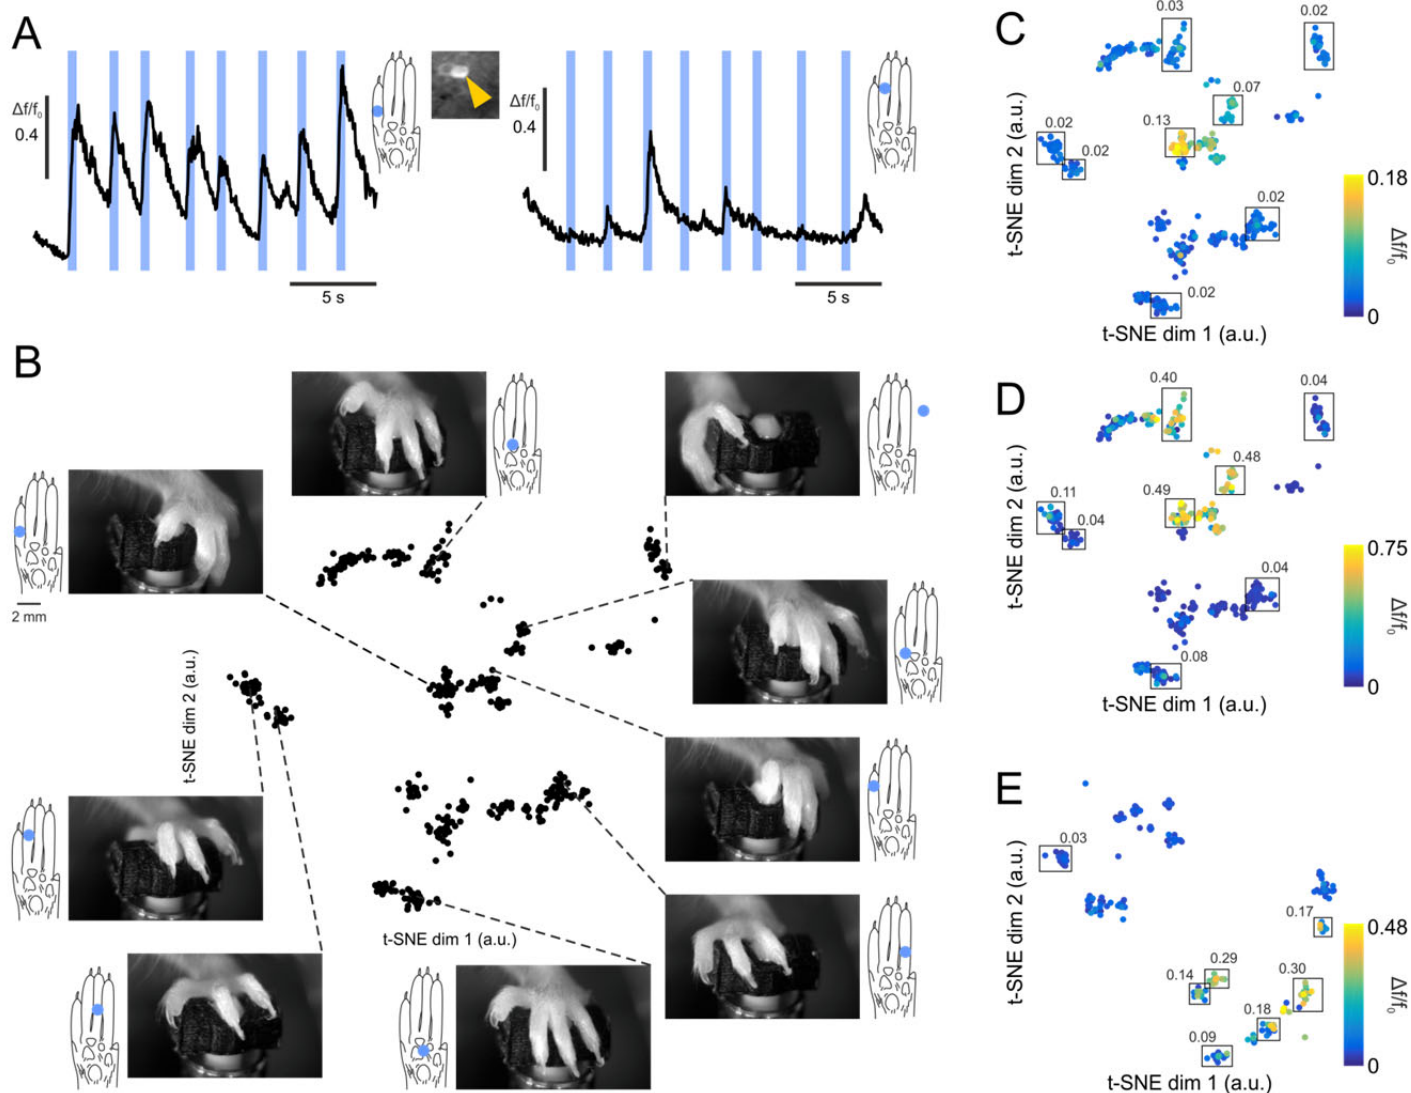

**Figure S7. Optogenetic forepaw stimulation analysis**

(A)  $\Delta f/f_0$  traces of an example neuron on two successive optogenetic stimulation (blue lines) trials with different paw placements relative to the optic fiber (blue filled circles). (B) Concatenated horizontal and vertical means of forepaw images immediately prior to stimulus onset were projected into a low-dimensional space using t-SNE. The formed clusters correspond to stimuli with highly similar paw placements relative to the optic fiber and were used to subjectively estimate locations of the optogenetic stimulation on the paw, as illustrated. (C-E)  $\Delta f/f_0$  responses for each neuron were used to color code the t-SNE projection points. The clearly visible clustering of high vs. low  $\Delta f/f_0$  values implies that stimulus locations on the paw are separable based on the size of  $\Delta f/f_0$  responses they evoke. The black squares denote clusters in t-SNE space used to evaluate average responses (indicated numerical values) evoked by stimulus locations shown in Fig. 6 (A-C).

1 **Movie S1. Vibratory stimulation of mouse forelimb during cortical imaging.**

2 Successive vibrations are delivered to the forelimb of a mouse followed by water reward. The numerical values indicate  
3 the moment of stimulation and the vibration frequency.

4  
5 **Movie S2. Vibratory stimulation of mouse forelimb followed by goal-directed reaching.**

6 Successive vibrations are delivered to the forelimb of a mouse followed by reaching for a water droplet. The numerical  
7 values indicate the moment of stimulation and the vibration frequency.

8  
9 **Movie S3. Optogenetic stimulation of mouse forepaw during cortical imaging.**

10  
11 **Movie S4. Monitoring of paw placement during optogenetic stimulation.**

12  
13  
14  
15  
16  
17  
18  
19  
20  
21  
22  
23  
24  
25  
26  
27  
28  
29  
30  
31  
32  
33  
34  
35  
36  
37  
38  
39  
40  
41  
42

## 1 **Methods**

### 2 **Animals**

3 Imaging and electrophysiology experiments were conducted with C57BL/6 (Charles River Laboratory) mice. Forepaw  
4 optogenetic stimulation experiments were conducted with double-transgenic mice generated by mating homozygote  
5 Ai32 males carrying a floxed ChR2-EYFP fusion gene inserted in the *Gt(ROSA)26Sor* locus in a C57BL/6 strain (Madisen et  
6 al., 2012) (Jackson Laboratory; stock no. 012569) with heterozygote ER81/Etv1-CreER females expressing the CreER<sup>T2</sup>  
7 fusion protein from the *ER81/Etv1* promoter elements (Taniguchi et al., 2011) (Jackson Laboratory; stock no. 013048). As  
8 such, Cre-mediated recombination results in an expression of the floxed ChR2-EYFP sequence in the ER81/Etv1-  
9 expressing cells of the offspring. ER81/Etv1 is expressed in Pacinian and Meissner corpuscles, glabrous skin  
10 mechanoreceptors associated with rapidly adapting afferents, as well as in their innervating neurons (Fleming et al.,  
11 2016). To induce CreER-based recombination, double-transgenic offspring (10 week old) were administered one daily  
12 dose of a 100  $\mu$ L tamoxifen (T5648, Sigma-Aldrich) solution (20 mg/mL) dissolved in sunflower oil (C8267, Sigma-Aldrich)  
13 for five consecutive days by peritoneal injection. Mice were housed in an animal facility, maintained on a 12:12  
14 light/dark cycle and were placed under a water restriction regime (1 ml/day) post-surgery. The experiments were  
15 performed during the light phase of the cycle. The animals did not undergo any previous surgery, drug administration or  
16 experiments and were housed in groups of maximum 5 animals per cage. All procedures complied with and were  
17 approved by the Institutional Animal Care and Use Committee of the University of Geneva and Geneva veterinary  
18 offices.

### 20 **Surgery**

21 12 to 15 week old mice were surgically prepared for head-fixed two-photon Ca<sup>2+</sup> imaging. Surgeries were conducted  
22 under isoflurane anaesthesia (1.5 to 2%) and additional analgesic (0.1 mg/kg buprenorphine intramuscular (i.m.)), local  
23 anaesthetic (75  $\mu$ L 1% lidocaine subcutaneous (s.c.) under the scalp) and anti-inflammatory drugs (2.5 mg/kg  
24 dexamethasone i.m. and 5 mg/kg carprofen s.c.) were administered. Mice were fixed on a bite bar with a snout clamp  
25 and rested on top of a heating pad. The scalp was cut over the midline between the ears and eyes. A custom made  
26 titanium head bar was fixed on the skull with a cyanoacrylate adhesive (ergo 5011, IBZ Industrie) and dental cement to  
27 allow for subsequent head fixation. A craniotomy was performed over the left frontal cortex and five viral injections (30  
28 to 50 nL each) were administered with pulled and beveled glass pipettes ( $\approx$ 25  $\mu$ m tip diameter) at an approximate rate  
29 of 20 nL/min into the forepaw representation of the primary somatosensory cortex (2.25 mm lateral and from -0.25 mm  
30 to 0.75 mm in 0.25 mm steps anterior to bregma). The injections consisted of AAV1.Syn.GCaMP6f.WPRE.SV40 (1:10  
31 dilution with 0.2% FastGreen in sterile saline, virus stock titer 6.932 x 10<sup>13</sup>) (University of Pennsylvania, lot. no. CS0939)  
32 at a depth of 350  $\mu$ m corresponding to cortical layers 2/3. After each injection completion, the pipette was left in place  
33 for at least another 10 min before being retracted. The cortical surface was rinsed for 1 to 2 min with dexamethasone  
34 (0.03%) and two hand-cut glass coverslips (150  $\mu$ m thickness) matched to the shape of the craniotomy were glued  
35 together with optical adhesive (NOA 61, Norland Products) and the lower one was placed on top of the cortex. The  
36 upper glass, which was larger than the craniotomy, was glued to the skull with cyanoacrylate adhesive and secured with  
37 dental cement. The correspondence between the injection sites and the sensory forepaw representation was confirmed  
38 post-operatively with intrinsic signal imaging in each mouse. After a seven day recovery period, mice were placed under  
39 the water restriction regime and experiments began on the 15<sup>th</sup> day after surgery.

### 40 **Intrinsic signal imaging**

41 Mice were head-fixed and placed on a heated platform under light isoflurane anaesthesia (0.25 to 0.75%). Their right  
42 forepaw rested on a metal rod (2 mm diameter) mounted on a galvanometric actuator (model. no. 000-G120D, GSI  
43 Lumonics). Ten 1 s vibrotactile stimuli consisting of a 100 Hz sinusoidal vibration were delivered to the forepaw with a 10  
44 s inter stimulus interval. The cranial window was illuminated by a collimated red light LED (635 nm peak, ACULED VHL,  
45 part. no. E001947, Perkin Elmer) and imaged with a CCD camera at 10 fps with a 256 by 332 pixels resolution (Retiga-  
46 2000R, Q Imaging). The average difference image between the stimulation period and a 1.5 s baseline period was  
47 processed by a 50 by 50 pixels spatial averaging filter and subsequently smoothed by a 5 by 5 pixels Gaussian low pass

1 filter with 0.5 pixels standard deviation. Stimulus presentation and image acquisition were controlled by Ephys software  
2 (Scanimage.org). The expression pattern of GCaMP6f was imaged by illuminating the cranial window with a collimated  
3 blue LED light (455 nm peak, ACULED VHL, part. no. E001947, Perkin Elmer) bandpass filtered between 465 and 495 nm  
4 (EX465-495 FITC, Nikon). Before detection, the emitted green light was bandpass filtered between 515 and 555 nm  
5 (BA515-555 FITC, Nikon).

## 7 **Two-photon Ca<sup>2+</sup> imaging**

8 Imaging was performed with a custom built two-photon microscope (MIMMS, [www.openwiki.janelia.org](http://www.openwiki.janelia.org)) controlled by  
9 Scanimage 5.1 (Vidrio Technologies) using a 16x 0.8 NA objective (Nikon) and with excitation wavelength at 940 nm  
10 (Ultra II, tunable Ti:Sapphire laser, Coherent). 512 by 512 pixel images covering 626 by 665  $\mu\text{m}$  of cortex were acquired  
11 at 29.82 Hz using bidirectional scanning with a resonant scanner system (Thorlabs). The power was modulated with  
12 pockels cell (350-80-LA-02, Conoptics) and calibrated with a photodiode (Thorlabs). The primary mirror for imaging was  
13 a custom polychroic (Chroma, zt470/561/nir-trans) transmitting the infrared light, while reflecting the green. Before  
14 detection, the remaining infrared light was filtered with a colored glass band pass filter (BG39, Chroma) while blue light  
15 used for optogenetic forepaw stimulation was removed with a short pass filter (CG475, Chroma). Images were acquired  
16 using photo multiplier tubes (H11706P-40 SEL, Hamamatsu) and written in 16 bit format to disk. The trial start, reward  
17 and stimulus onset TTL pulses issued by the behavior PC were received as auxiliary triggers and their timestamps saved  
18 in the headers of the acquired images. The saved timestamps were used for temporal alignment of Ca<sup>2+</sup> traces with  
19 behavioral variables during post-hoc analysis.

## 21 **Electrophysiology**

22  
23 In vivo recordings were performed in awake head-fixed mice (12 to 15 weeks old) and targeted to fS1. A small  
24 craniotomy was drilled over fS1 in mice surgically implanted with a head bar as described above. The electrode was an  
25 Ag/AgCl wire inserted into an internal solution filled glass pipette. The internal solution contained (in mM) K-gluconate  
26 134, KCl 6, HEPES 10, NaCl 4, Mg<sub>2</sub>-ATP 4, Tris<sub>2</sub>-GTP 0.3, Na-phosphocreatine 14, pH 7.25. The pulled glass pipettes had a  
27 tip-resistance of 6 to 12 M $\Omega$ . A second reference Ag/AgCl electrode connected to the headstage (CV-7B, Axon  
28 Instruments) was placed inside the recording chamber filled with saline. Positive pressure was applied as the pipette was  
29 lowered until 100  $\mu\text{m}$  below the pial surface and then advanced in 2  $\mu\text{m}$  steps. When action potentials were  
30 encountered, their wave shape had an initial negative phase. If upon further electrode advancement, the initial phase  
31 flipped to positive and action potential amplitude increased to many orders of magnitude above baseline, the recording  
32 was considered to be juxtacellular, and extracellular otherwise. All recordings were done in current clamp mode. The  
33 signal was amplified and filtered (0.1 Hz to 10 kHz) at the headstage and acquired at 30 kHz (PCI-MIO-16E-4, National  
34 Instruments) using custom Matlab (Mathworks) routines. Trial start and stimulus onset triggers were saved in parallel on  
35 separate channels and used for post-hoc alignment of recorded spikes.

## 37 **Pharmacology**

38  
39 To block neural transmission from the forepaw, mice were briefly anaesthetized with isoflurane (3%) and 50  $\mu\text{L}$  of  
40 Lidocaine (1%) was injected subcutaneously at level of the palmar wrist. Mice were subsequently head-fixed under the  
41 two-photon microscope and allowed to recover from anaesthesia. Vibrotactile responses were imaged from  $12.6 \pm 2.6$   
42 min to  $17.7 \pm 3.1$  min post-injection and compared to responses imaged  $\approx 10$  min pre-injection. The same procedure was  
43 repeated on either the previous or following day with 50  $\mu\text{L}$  of saline with responses being imaged from  $13.2 \pm 3.5$  min  
44 to  $18.3 \pm 3.7$  min post injection.

## 46 **Histology**

47  
48 After hair removal and PFA 4% intracardiac perfusion, mouse forelimbs were sectioned at the elbow. The samples were  
49 post-fixed in PFA 4% overnight and washed in PBS. The sectioned forelimbs were decalcified by immersion in EDTA-  
50 Citronensäure-Puffer pH 7.5 (ProTaq, BIOCYC GmbH & Co.) for 15 days at room temperature. The decalcifying agent

1 was changed once per week and decalcification was deemed complete by manually testing the bone resistance of each  
2 sample. 5  $\mu\text{m}$  thick transverse sections were taken between elbow and fingertips and embedded in paraffin. The  
3 sections were stained for eosin and hematoxylin using a standard protocol.

#### 4 **Vibrotactile stimuli**

5  
6  
7 The vibrotactile stimuli were generated by a piezoelectric stack actuator (P-841.3, Physik Instrumente) equipped with a  
8 strain gauge feedback sensor. A steel rod (2 mm diameter) on which mice placed their forepaw was mounted on the  
9 actuator. The actuator and sensor controllers (E-618.1 and E-509.S1, Physik Instrumente) operated in closed loop  
10 thereby counteracting any force the mouse applied. Pure sinusoids (250 ms duration, 25 ms linear onset/offset ramps)  
11 of 11 different frequencies (100 to 800 Hz in 70 Hz increments) calibrated to produce a 5.45  $\mu\text{m}$  displacement amplitude  
12 were sampled at 10 kHz (USB-6353, National Instruments) and fed to the actuator controller. The sensor measurements  
13 were continuously acquired and recalibration of motor commands was regularly performed for the stimuli to remain  
14 highly consistent. The spectrum of the acquired sensor measurements was analyzed post-hoc to ensure the integrity of  
15 their frequency content (**Fig. S1**). The 800 Hz upper bound was imposed by the controller's bandwidth for the 5.45  $\mu\text{m}$   
16 displacement. Two additional attenuated displacement amplitudes were tested with an extended frequency range: 1.08  
17  $\mu\text{m}$  (100 to 1360 Hz) and 0.23  $\mu\text{m}$  (100 to 1990 Hz).

#### 18 **Optogenetic stimuli**

19  
20  
21 Optogenetic stimuli were generated by blue light illumination (472 nm, 50 mW; Obis FP 473, Coherent) out of a fiber  
22 (3.5  $\mu\text{m}$  core diameter, 0.045 NA). The stimulus was a 20 Hz train of square pulses (500 ms duration, 25 ms pulse length)  
23 with the first and last pulses of the train set to half power (25 mW). The fiber was inserted and fixed in the center of a  
24 3D printed holder (3.5 mm diameter, 7.5 mm length) on which the mice placed their forepaw. The stimuli were delivered  
25 using the same trial structure as with vibrotactile stimuli.

#### 26 **Touch stimuli**

27  
28  
29 Touch stimuli were delivered either manually or in an automatized manner with a custom built device. Manual touches  
30 of different parts of the forepaw were gentle skin indentations using a 24 gauge needle. For automatized indentations, a  
31 metal rod (0.5 mm diameter) was mounted on a miniature 8  $\Omega$  speaker (32KC08-1, Veco Vansonics) and guided through a  
32 tube (3 mm outer diameter) that was inserted and fixed in the center of the 3D printed paw holder (see above). Touches  
33 were generated by relaying a 3 V signal to the speaker for 0.5 s and delivered using the same trial structure as with  
34 vibrotactile stimuli.

#### 35 **Behavioral procedures**

36  
37  
38 Mice sat head-fixed in a tube (25 mm inner diameter) and were trained to place the forepaw contralateral to the imaged  
39 cortical site on the stimulation device. The ipsilateral forelimb was blocked from protruding outside the tube. On every  
40 trial, eight successive stimuli were delivered with a randomly varied inter-stimulus-interval (1.5 s to 2.5 s) followed by a  
41 water reward. After reward consumption, a new trial started. Paw placement was monitored with a digital fiberoptic  
42 sensor (FX-301, Panasonic). Paw removal resulted in resetting the inter-stimulus-interval thereby enforcing that mice  
43 hold the stimulator at every stimulus onset. Frequent paw removals therefore prolonged trial duration and delayed  
44 reward delivery, incentivising mice to continuously hold the stimulator to achieve higher reward rates. Mice were  
45 trained  $\approx 1$  h/day for 7 to 10 days before the start of  $\text{Ca}^{2+}$  imaging experiments. The different vibrotactile frequencies  
46 were randomly sampled without replacement and at least 10 repetitions of each frequency were tested in a given  
47 imaging session.

48  
49 The described experimental design enforced that mice hold the vibration device upon stimulus presentation. Evoked  
50 responses could therefore not have been related to overt forelimb movements. However, stimulus-triggered muscle  
51 twitches, increases in stiffness or proprioceptive inputs cannot be excluded. We reasoned that neurons associated with



1 these covert motor acts would be activated by reach-to-grasp forelimb movements. Accordingly, as a control  
2 experiment, we modified the task by training mice to reach for the water reward instead of delivering it at the snout  
3 following the series of eight stimulus presentations. For this purpose, the water drop was presented at the opening of a  
4 descending metal tube placed at reaching distance and mice executed forelimb reaches to grasp and consume the  
5 droplet (**Movie S2**). Mice were trained  $\approx 1$  h/day for 10 to 14 days on this task before the start of  $\text{Ca}^{2+}$  imaging  
6 experiments.

7  
8 All behavior was controlled with real-time routines running on Linux (Bcontrol, [brodylab.princeton.edu/bcontrol](http://brodylab.princeton.edu/bcontrol)) and  
9 interfaced with Matlab (Mathworks) running on a separate PC.

## 10 **Two-photon image analysis**

### 11 *Movement correction*

12 To correct for lateral movements, a custom MATLAB registration algorithm was used to align each image to a template  
13 taken as the average image of a 30 s resting baseline period recorded at the start of each session. The cross-correlation  
14 was computed between each image and the template by multiplying the two-dimensional discrete Fourier transform of  
15 one with the complex conjugate of the Fourier transform of the other and taking the inverse Fourier transform of the  
16 product. The row and column location of the peak cross-correlation value was taken as the vertical and horizontal shift,  
17 respectively. 10% of each image was cropped at the boundaries for the purposes of this computation.

### 18 *Region of interest and $\text{Ca}^{2+}$ activity generation*

19 Using the session mean and variance images, soma centers of active neurons with clearly identifiable morphologies  
20 were manually initialized. Regions of interest of individual neurons and background were then identified as spatial  
21 footprints using the constrained nonnegative matrix factorization method (Pnevmatikakis et al., 2016) from the  
22 `ca_source_extraction` Matlab toolbox ([github.com/epnev/ca\\_source\\_extraction](https://github.com/epnev/ca_source_extraction)). This algorithm also provided the time-  
23 varying calcium activity of each neuron and background/neuropil as well as their time-varying baseline fluorescence. The  
24 two signals were used to compute  $\Delta f/f_0$  traces used for analysis with the modeled background activity removed. A  
25 denoised  $\Delta f/f_0$  trace of each cell was inferred with a constrained deconvolution approach.

## 26 **Data analysis**

### 27 *Significant responses*

28 The stimulus-evoked  $\Delta f/f_0$  response of a given neuron was computed as the difference between the maximum  $\Delta f/f_0$   
29 value post stimulus onset (between 0 and 0.6 s relative to onset) and the mean  $\Delta f/f_0$  value pre-stimulus onset (between  
30 0 s and -0.25 s relative to onset). This computation was repeated 1999 times for randomly shifted stimulus onset times  
31 across the neuron's activity trace of the entire session. In this manner, 1999 chance measures of the average  $\Delta f/f_0$   
32 response could be compared to the true  $\Delta f/f_0$  response means for each vibration frequency. If the true mean was more  
33 extreme than the upper 99<sup>th</sup> percentile of the chance values distribution, the neuron was deemed to be responsive to  
34 that particular stimulus frequency. This procedure constitutes a randomization test at significance level  $p < 0.01$ .

### 35 *Stimulus specific information*

36 As a measure of frequency ( $f$ ) encoding by a neuron's evoked  $\Delta f/f_0$  responses ( $r$ ) we calculated the stimulus specific  
37 information ( $SSI$ ) according to the method of Butts and Goldman (Butts, 2003; Butts and Goldman, 2006). The  
38 responses were first binned into one of 11 uniformly distributed values. We then computed the entropy of the stimulus  
39 ensemble

$$40 \quad H[F] = - \sum_f p(f) \log_2 p(f)$$

41 and the entropy of the stimulus distribution conditional on a particular binned response value

$$H[F|r] = - \sum_f p(f|r) \log_2 p(f|r)$$

1  $p(f)$  is the fraction of stimuli with frequency  $f$  and  $p(f|r)$  is, for a particular response  $r$ , the fraction of stimuli with  
2 frequency  $f$ .

3 The specific information of a response

$$i_{sp}(r) = H[F] - H[F|r]$$

4 represents the amount learned about the stimulus by a particular response and is used to compute the SSI as

$$SSI(f) = \sum_r p(r|f) i_{sp}(r)$$

5 where  $p(r|f)$  is, for a particular frequency  $f$ , the fraction of responses equal to binned value  $r$ . The SSI is the average  
6 information present in the evoked responses when vibration frequency  $f$  is present. Significant SSI values therefore  
7 identify vibration frequencies well-encoded by the neuron.

8  
9 The undersampled probability distributions, due to a finite number of stimulus repetitions at each frequency, result in  
10 biased SSI values. To correct for the bias, we computed the SSI with shuffled frequency labels and subtracted it from the  
11 SSI calculated with non-shuffled data. This procedure was repeated 1999 times and if the lower 99<sup>th</sup> percentile of the  
12 bias corrected SSI values was not more extreme than zero, SSI was deemed significant (i.e. randomization test at  
13 significance level  $p < 0.01$ ).

#### 14 *Tuning curve fitting*

15  
16 To characterize a neuron's tuning to vibration frequency, the normalized mean responses were fit to frequency ( $f$ ) by  
17 the following descriptive function using the method of non-linear least squares:

$$y(f) = (A - k) \exp(-(f - f_{best})^2 / \sigma) + k$$

18  
19  
20 where  $\sigma = \sigma_-$  and  $k = 0$  if  $f < f_{best}$ , and  $\sigma = \sigma_+$  and  $k = k_+$  if  $f > f_{best}$ . The five free parameters  $A$ ,  $k_+$ ,  $\sigma_-$ ,  $\sigma_+$  and  
21  $f_{best}$  were fit by constraining  $k_+$  to be less than 0.7 (normalized  $\Delta f / f_0$  to maximum mean response),  $A$  greater than 0.8  
22 and  $\sqrt{\sigma_+}$  less than 3000 Hz using the non-linear least squares method. The fits were classified as: (i) frequency selective  
23 if  $f_{best} \leq 730$  Hz and  $\sigma_+$  was not fixed at the bound, (ii) increases-to-plateau if  $f_{best} \leq 730$  Hz and  $\sigma_+$  was fixed at the  
24 bound, in which case the fit was repeated with unbounded  $\sigma_+$ , and (iii) monotonically increasing if  $f_{best} > 730$  Hz.

#### 25 *Phase-locked spiking*

26  
27  
28 To determine whether a neuron was entrained by the sinusoidal vibration, we first calculated for each spike its  
29 corresponding phase in the stimulus cycle (**Fig. 4B**) and grouped phase values across stimulus repetitions. For a given  
30 stimulus frequency, spiking was deemed to be phase-locked if the null hypothesis that phase angles are uniformly  
31 distributed could be rejected at significance level 0.01 (Rayleigh test for non-uniformity of circular data). Second, to  
32 control for variability in stimulus/response onset times, we calculated standardized inter-spike-intervals. For a given  
33 vibration frequency, inter-spike-intervals ( $ISI$ ) of all possible spike pairs that occurred during stimulation were  
34 calculated and grouped across stimulus repetitions. Because entrained spiking should yield an  $ISI$  distribution that peaks  
35 at integer multiples of the sinusoidal stimulus period  $T$ , values were converted to standardized inter-spike-intervals  
36 ( $S_{ISI}$ ) according to:

$$S_{ISI} = T + (ISI - nT)$$

37 where  $nT$  is the integer multiple of  $T$  closest to  $ISI$ . Spiking was deemed to be entrained by the stimulus periodicity if  
38 the null hypothesis that  $S_{ISI}$  values are uniformly distributed could be rejected at significance level 0.01 ( $\chi^2$  test).

#### 39 **Video analysis**

1 For optogenetic and touch stimuli, videos of the mouse forepaw were continuously acquired with a 1/3" CMOS camera  
2 (Firefly MV FMVU-03MTM, Point Grey Research). A custom video acquisition software programmed in Matlab  
3 (Mathworks) saved 8-bit greyscale images (376 x 240 pixels) to disk at a rate of 30 frames/s. The start of trial TTL pulses  
4 issued by the behavior PC were received as external triggers and frame times relative to trigger onset were saved in the  
5 image headers. The saved timestamps were used for temporal alignment with Ca<sup>2+</sup> traces during post-hoc analysis.

6 Images corresponding to frames immediately preceding stimulus onset were used for estimating the stimulated paw  
7 region. The horizontal and vertical means of each image were concatenated and the obtained traces mapped into a two-  
8 dimensional space with t-Distributed Stochastic Neighborhood Embedding (t-SNE) (van der Maaten and Hinton, 2008b)  
9 using the t-SNE Matlab toolbox ([lvdmaaten.github.io/tsne](http://lvdmaaten.github.io/tsne)). The initial dimensionality reduction via Principal Component  
10 Analysis performed by t-SNE was set to 5 dimensions and the t-SNE perplexity parameter to 15. The mapped points  
11 formed identifiable clusters, each corresponding to a different stimulated location on the paw (**Fig. 7B**). Paw locations  
12 associated with each cluster were subjectively determined by visual inspection. We estimated a neuron's receptive field  
13 by color coding the mapped points based on evoked  $\Delta f/f_0$  responses (**Fig. 7A-C and Fig. S7A-C**).

## 14 **Statistics and data**

15 No statistical methods were used to predetermine sample size and all experimental animals were included in the  
16 analysis. The normality assumption was tested with the Kolmogorov-Smirnov test. Non-parametric tests were used  
17 when the normality assumption was not met. All data analyses were performed with custom written routines in Matlab.

18  
19 All data analysed and all custom Matlab code used for the analysis in the current study are available from the  
20 corresponding author upon request.

## 22 **References**

- 23 Abraira, V.E., and Ginty, D.D. (2013). The sensory neurons of touch. *Neuron* 79, 618-639.
- 24 Arabzadeh, E., Panzeri, S., and Diamond, M.E. (2004). Whisker vibration information carried by rat barrel cortex neurons.  
25 *The Journal of neuroscience : the official journal of the Society for Neuroscience* 24, 6011-6020.
- 26 Arabzadeh, E., Petersen, R.S., and Diamond, M.E. (2003). Encoding of whisker vibration by rat barrel cortex neurons:  
27 implications for texture discrimination. *The Journal of neuroscience : the official journal of the Society for Neuroscience*  
28 23, 9146-9154.
- 29 Azevedo, A.W., and Wilson, R.I. (2017). Active Mechanisms of Vibration Encoding and Frequency Filtering in Central  
30 Mechanosensory Neurons. *Neuron* 96, 446-460 e449.
- 31 Bell, J., Bolanowski, S., and Holmes, M.H. (1994). The structure and function of Pacinian corpuscles: a review. *Progress in*  
32 *neurobiology* 42, 79-128.
- 33 Bensaïa, S.J., Denchev, P.V., Dammann, J.F., 3rd, Craig, J.C., and Hsiao, S.S. (2008). The representation of stimulus  
34 orientation in the early stages of somatosensory processing. *The Journal of neuroscience : the official journal of the*  
35 *Society for Neuroscience* 28, 776-786.
- 36 Butts, D.A. (2003). How much information is associated with a particular stimulus? *Network (Bristol, England)* 14, 177-  
37 187.
- 38 Butts, D.A., and Goldman, M.S. (2006). Tuning Curves, Neuronal Variability, and Sensory Coding. *PLoS biology* 4, e92.
- 39 Chen, T.-W., Wardill, T.J., Sun, Y., Pulver, S.R., Renninger, S.L., Baohan, A., Schreiter, E.R., Kerr, R.A., Orger, M.B.,  
40 Jayaraman, V., *et al.* (2013). Ultrasensitive fluorescent proteins for imaging neuronal activity. *Nature* 499, 295-300.
- 41 Cheung, S.W., Bedenbaugh, P.H., Nagarajan, S.S., and Schreiner, C.E. (2001). Functional organization of squirrel monkey  
42 primary auditory cortex: responses to pure tones. *Journal of neurophysiology* 85, 1732-1749.
- 43 Cocroft, R.B., and Rodríguez, R.L. (2005). The Behavioral Ecology of Insect Vibrational Communication. *BioScience* 55,  
44 323-334.
- 45 Crommett, L.E., Perez-Bellido, A., and Yau, J.M. (2017). Auditory adaptation improves tactile frequency perception.  
46 *Journal of neurophysiology* 117, 1352-1362.

- 1 Diamond, M.E., von Heimendahl, M., Knutsen, P.M., Kleinfeld, D., and Ahissar, E. (2008). 'Where' and 'what' in the  
2 whisker sensorimotor system. *Nature reviews Neuroscience* 9, 601-612.
- 3 Eggermont, J.J. (2001). Between sound and perception: reviewing the search for a neural code. *Hearing research* 157, 1-  
4 42.
- 5 Ewert, T.A., Vahle-Hinz, C., and Engel, A.K. (2008). High-frequency whisker vibration is encoded by phase-locked  
6 responses of neurons in the rat's barrel cortex. *The Journal of neuroscience : the official journal of the Society for*  
7 *Neuroscience* 28, 5359-5368.
- 8 Fleming, M.S., Li, J.J., Ramos, D., Li, T., Talmage, D.A., Abe, S.I., Arber, S., and Luo, W. (2016). A RET-ER81-NRG1 Signaling  
9 Pathway Drives the Development of Pacinian Corpuscles. *The Journal of neuroscience : the official journal of the Society*  
10 *for Neuroscience* 36, 10337-10355.
- 11 Fleming, M.S., and Luo, W. (2013). The anatomy, function, and development of mammalian Abeta low-threshold  
12 mechanoreceptors. *Frontiers in biology* 8.
- 13 Formby, C., Morgan, L.N., Forrest, T.G., and Raney, J.J. (1992). The role of frequency selectivity in measures of auditory  
14 and vibrotactile temporal resolution. *The Journal of the Acoustical Society of America* 91, 293-305.
- 15 Garion, L., Dubin, U., Rubin, Y., Khateb, M., Schiller, Y., Azouz, R., and Schiller, J. (2014). Texture coarseness responsive  
16 neurons and their mapping in layer 2-3 of the rat barrel cortex in vivo. *eLife* 3, e03405.
- 17 Harvey, M.A., Saal, H.P., Dammann, J.F., 3rd, and Bensmaia, S.J. (2013). Multiplexing stimulus information through rate  
18 and temporal codes in primate somatosensory cortex. *PLoS biology* 11, e1001558.
- 19 Heth, G., Frankenberg, E., Raz, A., and Nevo, E. (1987). Vibrational Communication in Subterranean Mole Rats (*Spalax*  
20 *ehrenbergi*). *Behavioral Ecology and Sociobiology* 21, 31-33.
- 21 Hill, P.S.M. (2008). *Vibration communication in animals* (Cambridge, Massachusetts: Harvard University press).
- 22 Hunt, C.C. (1961). On the nature of vibration receptors in the hind limb of the cat. *The Journal of physiology* 155, 175-  
23 186.
- 24 Hunt, C.C., and McIntyre, A.K. (1960). Characteristics of responses from receptors from the flexor longus digitorum  
25 muscle and the adjoining interosseous region of the cat. *The Journal of physiology* 153, 74-87.
- 26 Isett, B.R., Feasel, S.H., Lane, M.A., and Feldman, D.E. (2018). Slip-Based Coding of Local Shape and Texture in Mouse S1.  
27 *Neuron* 97, 418-433.e415.
- 28 Issa, J.B., Haeffele, B.D., Agarwal, A., Bergles, D.E., Young, E.D., and Yue, D.T. (2014). Multiscale optical Ca<sup>2+</sup> imaging of  
29 tonal organization in mouse auditory cortex. *Neuron* 83, 944-959.
- 30 Joachimsthaler, B., Uhlmann, M., Miller, F., Ehret, G., and Kurt, S. (2014). Quantitative analysis of neuronal response  
31 properties in primary and higher-order auditory cortical fields of awake house mice (*Mus musculus*). *The European*  
32 *journal of neuroscience* 39, 904-918.
- 33 Koay, G., Heffner, R., and Heffner, H. (2002). Behavioral audiograms of homozygous med(J) mutant mice with sodium  
34 channel deficiency and unaffected controls. *Hearing research* 171, 111-118.
- 35 Kumamoto, K., Senuma, H., Ebara, S., and Matsuura, T. (1993a). Distribution of pacinian corpuscles in the hand of the  
36 monkey, *Macaca fuscata*. *Journal of anatomy* 183 ( Pt 1), 149-154.
- 37 Kumamoto, K., Takei, M., Kinoshita, M., Ebara, S., and Matsuura, T. (1993b). Distribution of pacinian corpuscles in the cat  
38 forefoot. *Journal of anatomy* 182, 23-28.
- 39 Mackevicius, E.L., Best, M.D., Saal, H.P., and Bensmaia, S.J. (2012). Millisecond precision spike timing shapes tactile  
40 perception. *The Journal of neuroscience : the official journal of the Society for Neuroscience* 32, 15309-15317.
- 41 Madisen, L., Mao, T., Koch, H., Zhuo, J.-m., Berenyi, A., Fujisawa, S., Hsu, Y.-W.A., Garcia, A.J., Gu, X., Zanella, S., *et al.*  
42 (2012). A toolbox of Cre-dependent optogenetic transgenic mice for light-induced activation and silencing. *Nature*  
43 *neuroscience* 15, 793-802.
- 44 Manfredi, L.R., Baker, A.T., Elias, D.O., Dammann, J.F., 3rd, Zielinski, M.C., Polashock, V.S., and Bensmaia, S.J. (2012). The  
45 effect of surface wave propagation on neural responses to vibration in primate glabrous skin. *PLoS one* 7, e31203.
- 46 Manita, S., Suzuki, T., Homma, C., Matsumoto, T., Odagawa, M., Yamada, K., Ota, K., Matsubara, C., Inutsuka, A., Sato,  
47 M., *et al.* (2015). A Top-Down Cortical Circuit for Accurate Sensory Perception. *Neuron* 86, 1304-1316.
- 48 Maricich, S.M., Morrison, K.M., Mathes, E.L., and Brewer, B.M. (2012). Rodents rely on Merkel cells for texture  
49 discrimination tasks. *The Journal of neuroscience : the official journal of the Society for Neuroscience* 32, 3296-3300.
- 50 Montgomery, N., and Wehr, M. (2010). Auditory cortical neurons convey maximal stimulus-specific information at their  
51 best frequency. *The Journal of neuroscience : the official journal of the Society for Neuroscience* 30, 13362-13366.

- 1 Mountcastle, V.B., Talbot, W.H., Sakata, H., and Hyvarinen, J. (1969). Cortical neuronal mechanisms in flutter-vibration  
2 studied in unanesthetized monkeys. Neuronal periodicity and frequency discrimination. *Journal of neurophysiology* 32,  
3 452-484.
- 4 O'Connell-Rodwell, C.E. (2007). Keeping an "Ear" to the Ground: Seismic Communication in Elephants. *Physiology* 22,  
5 287-294.
- 6 Pnevmatikakis, E.A., Soudry, D., Gao, Y., Machado, T.A., Merel, J., Pfau, D., Reardon, T., Mu, Y., Lacefield, C., Yang, W., *et*  
7 *al.* (2016). Simultaneous Denoising, Deconvolution, and Demixing of Calcium Imaging Data. *Neuron* 89, 285-299.
- 8 Rado, R., Levi, N., Hauser, H., Witcher, J., Alder, N., Intrator, N., Wollberg, Z., and Terkel, J. (1987). Seismic signalling as a  
9 means of communication in a subterranean mammal. *Animal Behaviour* 35, 1249-1251.
- 10 Rado, R., Terkel, J., and Wollberg, Z. (1998). Seismic communication signals in the blind mole-rat (*Spalax ehrenbergi*):  
11 electrophysiological and behavioral evidence for their processing by the auditory system. *Journal of comparative*  
12 *physiology A, Sensory, neural, and behavioral physiology* 183, 503-511.
- 13 Reuter, T., Nummela, S., and Hemilä, S. (1998). Elephant hearing. *The Journal of the Acoustical Society of America* 104,  
14 1122-1123.
- 15 Saal, H.P., Wang, X., and Bensmaia, S.J. (2016). Importance of spike timing in touch: an analogy with hearing? *Current*  
16 *opinion in neurobiology* 40, 142-149.
- 17 Salinas, E., Hernandez, A., Zainos, A., and Romo, R. (2000). Periodicity and firing rate as candidate neural codes for the  
18 frequency of vibrotactile stimuli. *The Journal of neuroscience : the official journal of the Society for Neuroscience* 20,  
19 5503-5515.
- 20 Severson, K.S., Xu, D., Van de Loo, M., Bai, L., Ginty, D.D., and O'Connor, D.H. (2017). Active Touch and Self-Motion  
21 Encoding by Merkel Cell-Associated Afferents. *Neuron* 94, 666-676 e669.
- 22 Sutter, M.L. (2000). Shapes and level tolerances of frequency tuning curves in primary auditory cortex: quantitative  
23 measures and population codes. *Journal of neurophysiology* 84, 1012-1025.
- 24 Talbot, W.H., Darian-Smith, I., Kornhuber, H.H., and Mountcastle, V.B. (1968). The sense of flutter-vibration: comparison  
25 of the human capacity with response patterns of mechanoreceptive afferents from the monkey hand. *Journal of*  
26 *neurophysiology* 31, 301-334.
- 27 Taniguchi, H., He, M., Wu, P., Kim, S., Paik, R., Sugino, K., Kvitsiani, D., Fu, Y., Lu, J., Lin, Y., *et al.* (2011). A resource of Cre  
28 driver lines for genetic targeting of GABAergic neurons in cerebral cortex. *Neuron* 71, 995-1013.
- 29 van der Maaten, L., and Hinton, G. (2008a). Visualizing data using t-SNE. *The Journal of Machine Learning Research* 9, 85.
- 30 van der Maaten, L., and Hinton, G. (2008b). Visualizing Data using t-SNE. *Journal of Machine Learning Research* 9, 2579-  
31 2605.
- 32 Yau, J.M., Olenczak, J.B., Dammann, J.F., and Bensmaia, S.J. (2009). Temporal frequency channels are linked across  
33 audition and touch. *Current biology : CB* 19, 561-566.
- 34 Zelena, J. (1994). *Nerves and Mechanoreceptors* (London: Chapman & Hall).
